# Supplementary material
Source: publisher figshare collection journal article supplement (https://frontiersin.figshare.com/ndownloader/files/22364763)
Supplement: Supplementary file [file 22364763]

# Supplementary Material

## Supplementary Figures

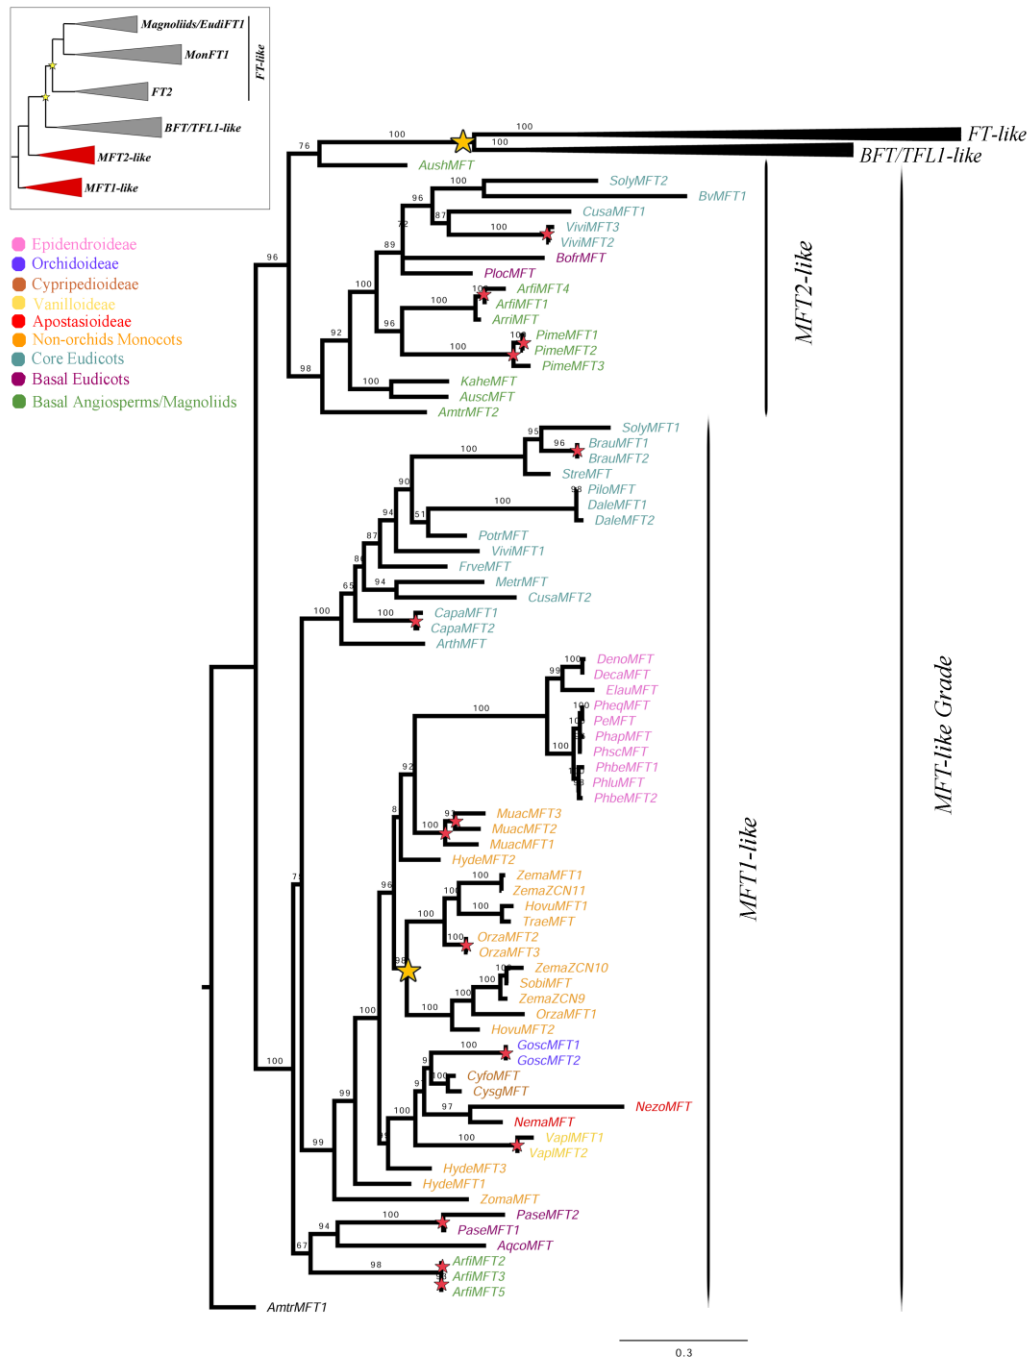

**Supplementary Figure 1.** ML analysis of angiosperm PEBP genes. Summary tree (upper left), the expanded clade in the figure is indicated in red. Yellow stars indicate large-scale duplication events, while red stars represent intra-specific duplications. The numbers on each node indicate the UFBS values. Collapsed clades correspond to *FT-like* (Figures 1-3) and *BFT/TFL1-like* (Figure 4). The colors of the taxa correspond to the conventions on the left. The scale of the tree is 0.2.

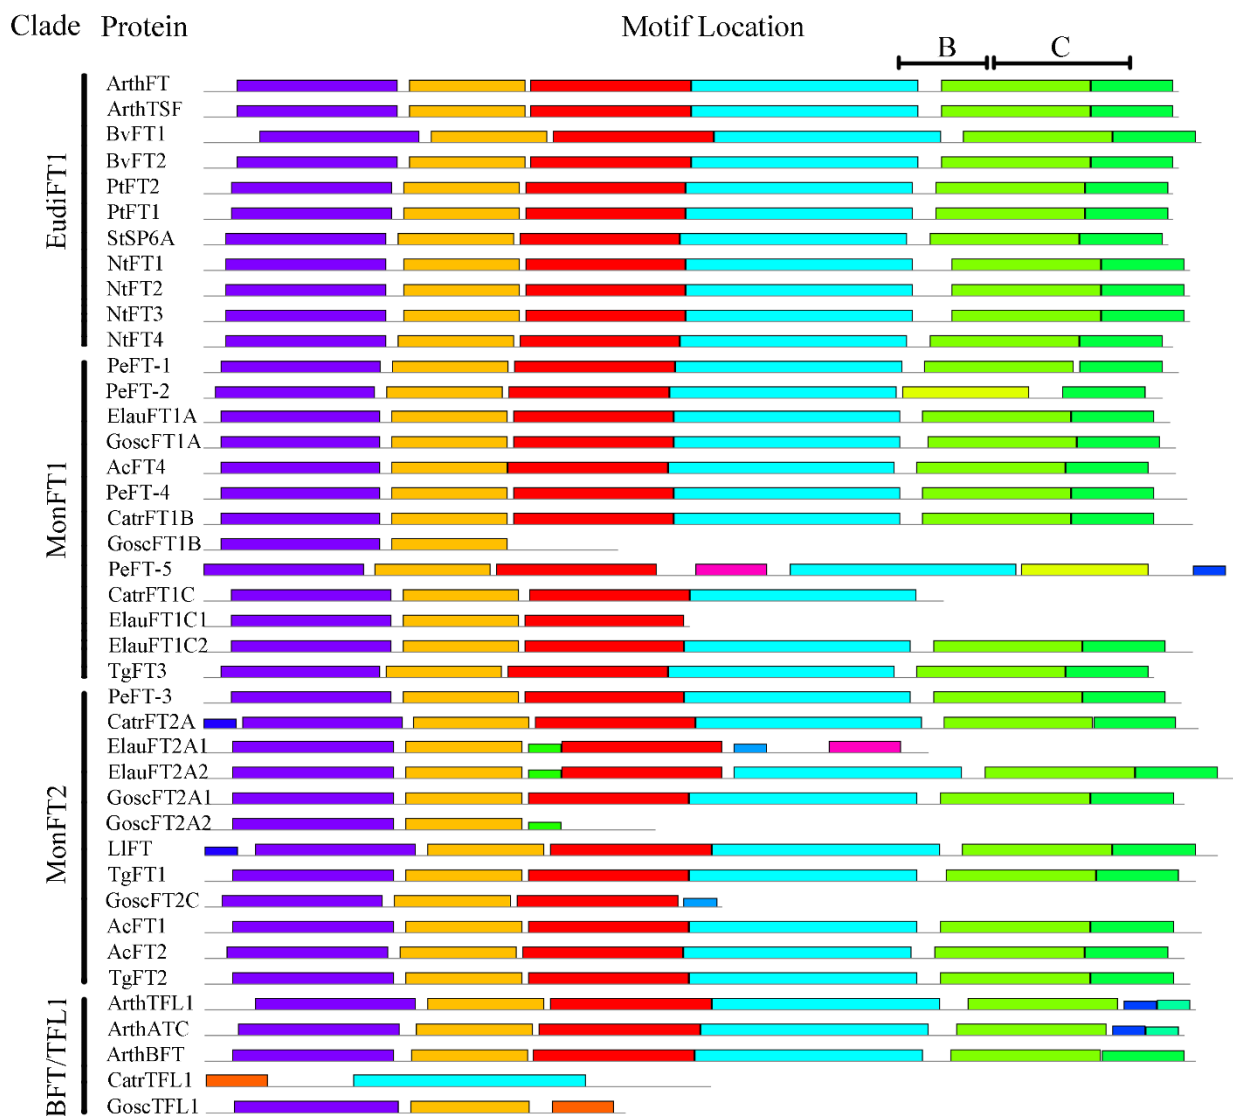

**Supplementary Figure 2.** MEME analysis of protein motifs. Names to the left indicate the clade to which sequences belong according to Figures 1-4. The upper bars point to the segment B and C reported in *Arabidopsis thaliana* (Anh et al., 2006). The number assigned to each motif and its respective logo are shown in the lower part of the figure. In motif three, the position homologous to Tyr-85 and His-88 of FT and TFL1 of *A. thaliana* respectively is indicated with a red triangle (Hanzawa et al. 2005).

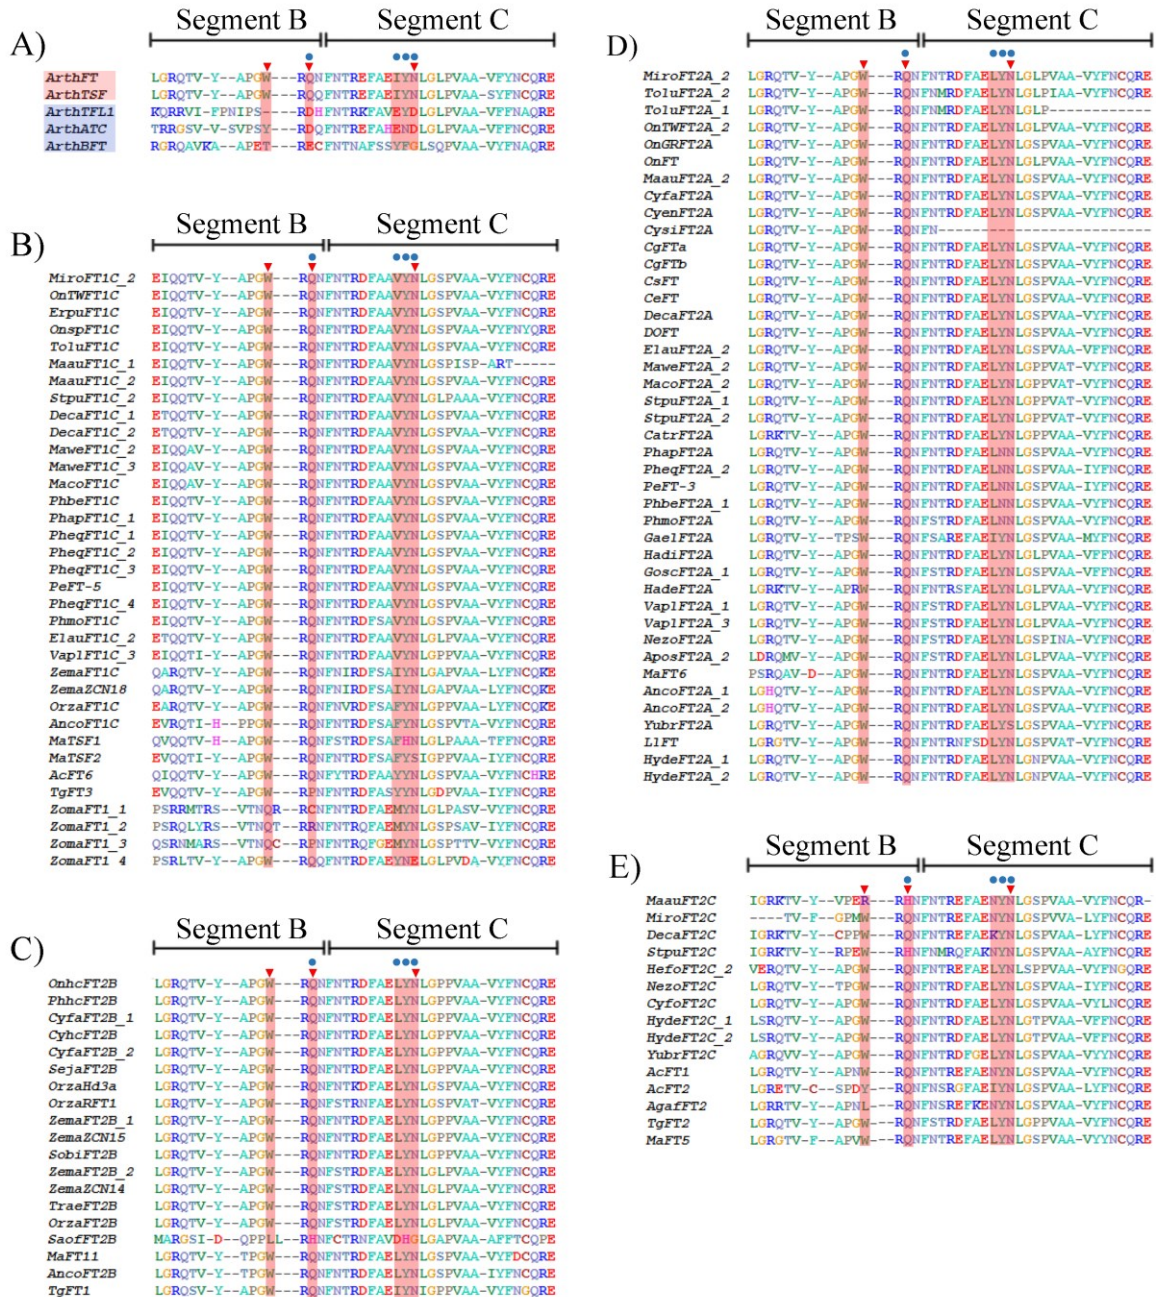

**Supplementary figure 3.** Alignment of fragments B and C of FT-like proteins isolated from monocots. **(A)** PEBP proteins from *Arabidopsis thaliana*, with the exception of MFT. Blue dots (following Ahn et al. 2006) and red triangles (following critical residues identified by Ho and Weigel, 2014) indicate key amino acids distinguishing FT and TFL-like homologues. **(B)** *MonFT1C* clade. **(C)** *MonFT2B* clade. **(D)** *MonFT2A* clade. **(E)** *MonFT2C* clade. In **(A)**, the red boxes on the names of the sequences indicate proteins with flowering promoter function, while the blue boxes indicate proteins with repress function.

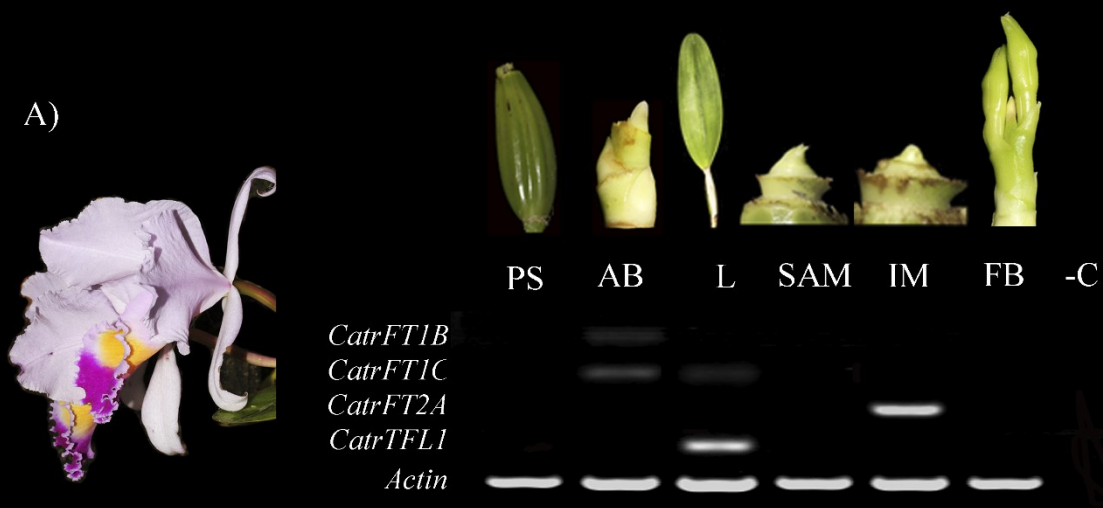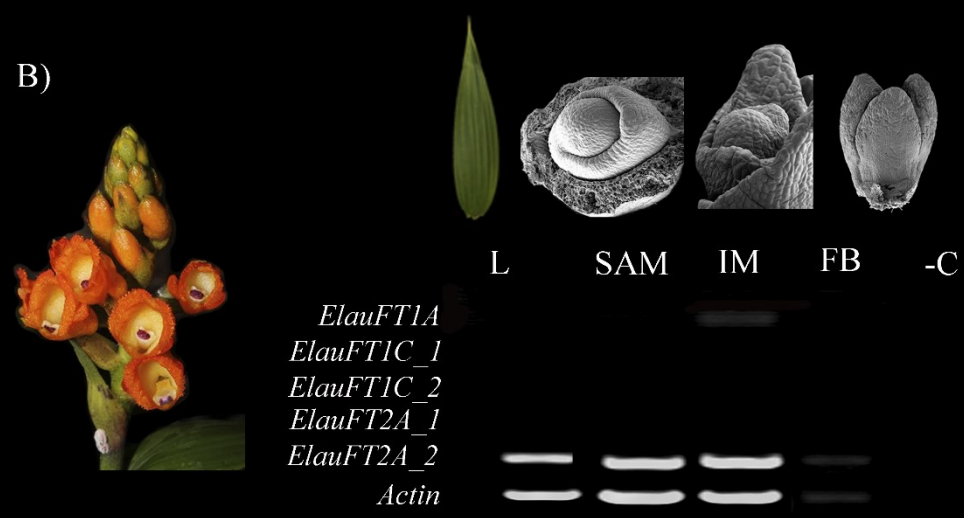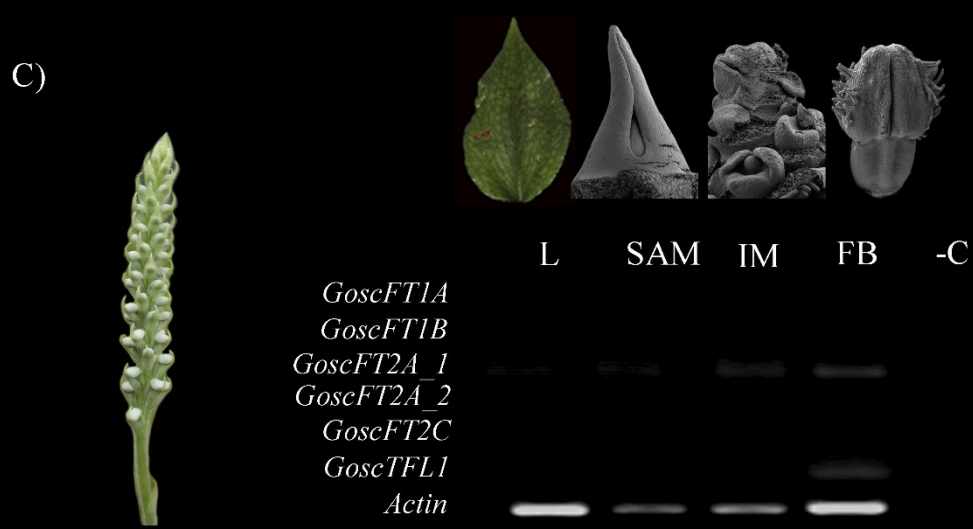

**Supplementary Figure 4.** Expression analysis of *FT/TFL1-like* genes in selected orchids. Amplifications performed in 30 cycles. **(A)** *Cattleya trianae*. **(B)** *Elleanthus aurantiacus*. **(C)** *Gomphichis scaposa*. AB: Axillary bud, BF: Floral bud, IM: Inflorescence meristem, L: Leaf, PB: Pseudobulb and SAM: Apical vegetative meristem. Each dissection correspond with a light stereoscope photograph. -C indicated the PCR amplification lacking cDNA as a load control.



## Supplementary Tables

**Supplementary Table 1.** Species of selected Neotropical orchids that have new sequenced transcriptome.

| <b>Specie</b>                           | <b>Habit</b> | <b>Number of flowers per inflorescence</b> | <b>Pseudobulb</b> | <b>Voucher code</b> |
|-----------------------------------------|--------------|--------------------------------------------|-------------------|---------------------|
| <i>Elleanthus aurantiacus</i>           | Terrestrial  | More than 10                               | Absent            | NP394               |
| <i>Gomphichis scaposa</i>               | Terrestrial  | More than 30                               | Absent            | NP398               |
| <i>Masdevallia coccinea</i>             | Terrestrial  | 1                                          | Absent            | YMB30               |
| <i>Masdevallia wendlandiana</i>         | Epiphyte     | 1                                          | Absent            | YMB31               |
| <i>Maxillaria aurea</i>                 | Terrestrial  | Ca. 5                                      | Absent            | YMB36               |
| <i>Miltoniopsis roezlii</i>             | Epiphyte     | Ca. 5                                      | Present           | YMB33               |
| <i>Oncidium</i> Gower Ramsey            | Epiphyte     | More than 20                               | Present           | NP396               |
| <i>Oncidium</i> Twinkle                 | Epiphyte     | More than 20                               | Present           | YMB32               |
| <i>Stelis pusilla</i>                   | Epiphyte     | More than 20                               | Absent            | YMB37<br>NP423      |
| <i>Tolumnia</i> Cherry red x Ralph yagh | Epiphyte     | Ca. 10                                     | Present           | NP397               |

**Supplementary table 2.** Primers used for *FT/TFL1-like* gene expression analyses. *Fwd* indicate forward primer. *Rev* indicate reverse primer.

| Specie name                   | Primer name               | Sequence             | T <sub>m</sub> (°C) | Amplicon size (bp) |
|-------------------------------|---------------------------|----------------------|---------------------|--------------------|
| <i>Cattleya trianae</i>       | <i>CatrFT1BFwd</i>        | CGTCCATGAACGTGATCTAT | 56.4                | 379                |
| <i>Cattleya trianae</i>       | <i>CatrFT1BRev</i>        | GCAGTTGAAGTACATGGCA  | 55.2                |                    |
| <i>Cattleya trianae</i>       | <i>CatrFT1CFwd</i>        | GTAGGTGATGTGCTGGAC   | 56.1                | 283                |
| <i>Cattleya trianae</i>       | <i>CatrFT1CRev</i>        | CGATGAATTCCAGCTTGT   | 51.6                |                    |
| <i>Cattleya trianae</i>       | <i>CatrFT2AFwd</i>        | GAGTTATAGGTGATGTACTT | 52.3                | 293                |
| <i>Cattleya trianae</i>       | <i>CatrFT2ARev</i>        | CGAAGATGAAGCGGTGTAT  | 55.2                |                    |
| <i>Cattleya trianae</i>       | <i>CatrTFL1Fwd</i>        | CACTGGTCATGACTGATC   | 53.9                | 169                |
| <i>Cattleya trianae</i>       | <i>CatrTFL1Rev</i>        | CACCGATAGCCTTCGCTT   | 56.1                |                    |
| <i>Elleanthus aurantiacus</i> | <i>ElauFT1AFwd</i>        | GATCATTTAGTGAGGTTA   | 47.0                | 289                |
| <i>Elleanthus aurantiacus</i> | <i>ElauFT1ARev</i>        | GAAGTGTGCGTAAGAGTGC  | 53.9                |                    |
| <i>Elleanthus aurantiacus</i> | <i>ElauFT1C1/FT1C2Fwd</i> | GGTGACGTGCTGGATCCT   | 58.4                | 270                |
| <i>Elleanthus aurantiacus</i> | <i>ElauFT1C1Rev</i>       | GCTTAAAGCTTACCAATG   | 49.3                |                    |
| <i>Elleanthus aurantiacus</i> | <i>ElauFT1C2Rev</i>       | GATGAATTCCAGCTAGTG   | 51.6                | 276                |

|                               |                           |                           |      |     |
|-------------------------------|---------------------------|---------------------------|------|-----|
| <i>Elleanthus aurantiacus</i> | <i>ElauFT2A1/FT2A2Fwd</i> | GTGATAGGTGATGTACTTGAT     | 55.5 | 270 |
| <i>Elleanthus aurantiacus</i> | <i>ElauFT2A1Rev</i>       | CTTTATACATGTACTCAC        | 47.0 |     |
| <i>Elleanthus aurantiacus</i> | <i>ElauFT2A2Rev</i>       | GATATAGCGGTGTATGCCA<br>TA | 56.4 | 309 |
| <i>Gomphichis scaposa</i>     | <i>GoscFT1AFwd</i>        | GATCATAACAGTGAGGTTTAG     | 54.3 | 316 |
| <i>Gomphichis scaposa</i>     | <i>GoscFT1ARev</i>        | CGCACTTCTGGCTCAATGA       | 57.3 |     |
| <i>Gomphichis scaposa</i>     | <i>GoscFT1BFwd</i>        | GTCGTCGGCAATGTTGTAG       | 57.3 | 147 |
| <i>Gomphichis scaposa</i>     | <i>GoscFT1BRev</i>        | CCACTTACTAGCGTATAA        | 49.3 |     |
| <i>Gomphichis scaposa</i>     | <i>GoscFT2A1/FT2A2Fwd</i> | GAGTGATAGGCGATGTTC<br>TC  | 58.4 | 280 |
| <i>Gomphichis scaposa</i>     | <i>GoscFT2A1Rev</i>       | CGATGTATACCAAGACTC        | 51.6 |     |
| <i>Gomphichis scaposa</i>     | <i>GoscFT2A2Rev</i>       | CTGTGACTAACCAGAGTA        | 51.6 | 139 |
| <i>Gomphichis scaposa</i>     | <i>GoscFT2CFwd</i>        | GAGTGATTGGTGACGTGT        | 53.9 | 193 |
| <i>Gomphichis scaposa</i>     | <i>GoscFT2CRev</i>        | CTGCAGTGAAGATATTCT<br>CT  | 54.3 |     |
| <i>Gomphichis scaposa</i>     | <i>GoscTFL1Fwd</i>        | GCGAAGTGCTCGAATCCT        | 56.1 | 140 |
| <i>Gomphichis scaposa</i>     | <i>GoscTFL1Rev</i>        | CGTCTGGATCGGTCATTA        | 53.9 |     |

|                         |               |                               |    |       |
|-------------------------|---------------|-------------------------------|----|-------|
| <i>Cattleya trianae</i> | qCatrTFL1Rev  | TGCGAAGCCACGTGTATTA           | 54 | < 150 |
| <i>Cattleya trianae</i> | qCatrTFL1Fwd  | AGCTGGTTCCTATGAGAGC           | 54 |       |
| <i>Cattleya trianae</i> | qCatrFT2ARev  | GGGCTCTCGTAGCACACTAT          | 54 | < 150 |
| <i>Cattleya trianae</i> | qCatrFT2AFwd  | AGCCGAGAGTTGAAGTTGGA          | 54 |       |
| <i>Cattleya trianae</i> | qCatrFT1CRev  | TGCGGTCCTTCGTAGTAGAC          | 54 | < 150 |
| <i>Cattleya trianae</i> | qCatrFT1CFwd  | GGTTGAGATTGGTGGTGGTG          | 54 |       |
| <i>Cattleya trianae</i> | qCatrFT1BRev  | TTCCCTCTGGCAGTTGAAGT          | 54 | < 150 |
| <i>Cattleya trianae</i> | qCatrFT1BFwd  | AGCCGGGATCCATCGAATAG          | 54 |       |
| <i>Cattleya trianae</i> | qOrchActinFwd | TGCTGGATTCTGGTGATGGT          | 54 | < 150 |
| <i>Cattleya trianae</i> | qOrchActinRev | CAATTCACGCTCTGCGGTA           | 54 |       |
| <i>Cattleya trianae</i> | 18SFwd        | GAGAAATCAAAGTTTTTG<br>GGTTCCG | 54 | < 150 |
| <i>Cattleya trianae</i> | 18SRev        | CCGTGTTGAGTCAAATTA<br>AGCCGC  | 54 |       |

**Supplementary table 3.** List of sequences used in this study.

| Gene code | Locus name                               | Data base | Specie                       | Family         | Order        |
|-----------|------------------------------------------|-----------|------------------------------|----------------|--------------|
| AcFT1     | KC485348.1                               | NCBI      | <i>Allium cepa</i>           | Amaryllidaceae | Asparagales  |
| AcFT2     | KC485349.1                               | NCBI      | <i>Allium cepa</i>           | Amaryllidaceae | Asparagales  |
| AcFT3     | KC485350.1                               | NCBI      | <i>Allium cepa</i>           | Amaryllidaceae | Asparagales  |
| AcFT4     | KC485351.1                               | NCBI      | <i>Allium cepa</i>           | Amaryllidaceae | Asparagales  |
| AcFT5     | KC485352.1                               | NCBI      | <i>Allium cepa</i>           | Amaryllidaceae | Asparagales  |
| AcFT6     | KC485353.1                               | NCBI      | <i>Allium cepa</i>           | Amaryllidaceae | Asparagales  |
| AgafFT2   | PRFO_scaffold_2024105                    | 1KP       | <i>Agapanthus africanus</i>  | Amaryllidaceae | Asparagales  |
| AgteFT1A  | KXSK_scaffold_2021615                    | 1KP       | <i>Agave tequila</i>         | Asparagaceae   | Asparagales  |
| AmtrFT1   | XM_006858577.3                           | NCBI      | <i>Amborella trichopoda</i>  | Amborellaceae  | Amborellales |
| AmtrFT2   | URDJ_scaffold_2034066                    | 1KP       | <i>Amborella trichopoda</i>  | Amborellaceae  | Amborellales |
| AmtrFT3   | evm_27.model.AmTr_v1.0_scaffold00066.24  | Phytozome | <i>Amborella trichopoda</i>  | Amborellaceae  | Amborellales |
| AmtrMFT1  | evm_27.model.AmTr_v1.0_scaffold00024.325 | Phytozome | <i>Amborella trichopoda</i>  | Amborellaceae  | Amborellales |
| AmtrMFT2  | evm_27.model.AmTr_v1.0_scaffold00003.462 | Phytozome | <i>Amborella trichopoda</i>  | Amborellaceae  | Amborellales |
| AmtrTFL1  | evm_27.model.AmTr_v1.0_scaffold00114.23  | Phytozome | <i>Amborella trichopoda</i>  | Amborellaceae  | Amborellales |
| AnarBFT   | TQKZ_scaffold_2057863                    | 1KP       | <i>Angelica archangelica</i> | Apiaceae       | Apiales      |
| AncoFT1B1 | Aco003470.1                              | Phytozome | <i>Ananas comosus</i>        | Bromeliaceae   | Poales       |
| AncoFT1B2 | Aco008070.1                              | Phytozome | <i>Ananas comosus</i>        | Bromeliaceae   | Poales       |

# Supplementary Material

|            |                    |             |                              |               |              |
|------------|--------------------|-------------|------------------------------|---------------|--------------|
| AncoFT1C   | Aco004692.1        | Phytozome   | <i>Ananas comosus</i>        | Bromeliaceae  | Poales       |
| AncoFT2A1  | HQ343233           | NCBI        | <i>Ananas comosus</i>        | Bromeliaceae  | Poales       |
| AncoFT2A2  | Aco010684.1        | Phytozome   | <i>Ananas comosus</i>        | Bromeliaceae  | Poales       |
| AncoFT2B   | Aco010683.1        | Phytozome   | <i>Ananas comosus</i>        | Bromeliaceae  | Poales       |
| AncoTFL1_1 | Aco031443.1        | Phytozome   | <i>Ananas comosus</i>        | Bromeliaceae  | Poales       |
| AncoTFL1_2 | Aco016718.1        | Phytozome   | <i>Ananas comosus</i>        | Bromeliaceae  | Poales       |
| ApostBFT   | AUTC016670         | ORCHIDSTR A | <i>Apostasia wallichii</i>   | Orchidaceae   | Asparagales  |
| ApostFT2A1 | AUTC002880         | ORCHIDSTR A | <i>Apostasia wallichii</i>   | Orchidaceae   | Asparagales  |
| ApostFT2A2 | AUTC002879         | ORCHIDSTR A | <i>Apostasia wallichii</i>   | Orchidaceae   | Asparagales  |
| ApshFT1B   | Unigene16175_Ap_fb | Orchidbase  | <i>Apostasia shenzhenica</i> | Orchidaceae   | Asparagales  |
| AqcoCEN1   | Aqcoe2G140500.1    | Phytozome   | <i>Aquilegia coerulea</i>    | Ranunculaceae | Ranunculales |
| AqcoCEN2   | Aqcoe1G447900.1    | Phytozome   | <i>Aquilegia coerulea</i>    | Ranunculaceae | Ranunculales |
| AqcoCEN3   | Aqcoe1G447700.1    | Phytozome   | <i>Aquilegia coerulea</i>    | Ranunculaceae | Ranunculales |
| AqcoCEN4   | Aqcoe1G447800.1    | Phytozome   | <i>Aquilegia coerulea</i>    | Ranunculaceae | Ranunculales |
| AqcoFT1_1  | Aqcoe4G257600.1    | Phytozome   | <i>Aquilegia coerulea</i>    | Ranunculaceae | Ranunculales |
| AqcoFT1_2  | Aqcoe4G263600.1    | Phytozome   | <i>Aquilegia coerulea</i>    | Ranunculaceae | Ranunculales |

|           |                          |           |                                   |                   |                  |
|-----------|--------------------------|-----------|-----------------------------------|-------------------|------------------|
| AqcoFT1_3 | Aqcoe2G432300.1          | Phytozome | <i>Aquilegia<br/>coerulea</i>     | Ranunculaceae     | Ranunculales     |
| AqcoMFT   | Aqcoe3G016200.1          | Phytozome | <i>Aquilegia<br/>coerulea</i>     | Ranunculaceae     | Ranunculales     |
| ArfiFT1   | TRINITY_DN13952_c0_g1_i1 | UdeA      | <i>Aristolochia<br/>fimbriata</i> | Aristolochiaceae  | Piperales        |
| ArfiMFT1  | c12632_g1_i1             | UdeA      | <i>Aristolochia<br/>fimbriata</i> | Aristolochiaceae  | Piperales        |
| ArfiMFT2  | c729_g2_i1               | UdeA      | <i>Aristolochia<br/>fimbriata</i> | Aristolochiaceae  | Piperales        |
| ArfiMFT3  | c729_g1_i1               | UdeA      | <i>Aristolochia<br/>fimbriata</i> | Aristolochiaceae  | Piperales        |
| ArfiMFT4  | TRINITY_DN9162_c4_g6_i2  | UdeA      | <i>Aristolochia<br/>fimbriata</i> | Aristolochiaceae  | Piperales        |
| ArfiMFT5  | TRINITY_DN9601_c6_g7_i1  | UdeA      | <i>Aristolochia<br/>fimbriata</i> | Aristolochiaceae  | Piperales        |
| ArriFT1   | TRINITY_DN19698_c0_g1_i1 | UdeA      | <i>Aristolochia<br/>ringens</i>   | Aristolochiaceae  | Piperales        |
| ArriMFT   | TRINITY_DN33419_c0_g1_i1 | UdeA      | <i>Aristolochia<br/>ringens</i>   | Aristolochiaceae  | Piperales        |
| ArthATC   | AB024715.1               | NCBI      | <i>Arabidopsis<br/>thaliana</i>   | Brassicaceae      | Brassicales      |
| ArthBFT   | NM_125597.2              | NCBI      | <i>Arabidopsis<br/>thaliana</i>   | Brassicaceae      | Brassicales      |
| ArthFT    | AB027504.1               | NCBI      | <i>Arabidopsis<br/>thaliana</i>   | Brassicaceae      | Brassicales      |
| ArthMFT   | AF147721.1               | NCBI      | <i>Arabidopsis<br/>thaliana</i>   | Brassicaceae      | Brassicales      |
| ArthTFL1  | U77674.1                 | NCBI      | <i>Arabidopsis<br/>thaliana</i>   | Brassicaceae      | Brassicales      |
| ArthTSF   | AB027506.1               | NCBI      | <i>Arabidopsis<br/>thaliana</i>   | Brassicaceae      | Brassicales      |
| AuscMFT   | FZJL_scaffold_2000368    | 1KP       | <i>Austrobaileya<br/>scandens</i> | Austrobaileyaceae | Austrobaileyales |

# Supplementary Material

|           |                          |      |                                |                     |                      |
|-----------|--------------------------|------|--------------------------------|---------------------|----------------------|
| AushMFT   | YYPE_scaffold_2007933    | 1KP  | <i>Austrobaileya chilensis</i> | Austrobaileya<br>ae | Austrobaileyal<br>es |
| BofrFT1   | comp56561_c0_seq1        | UdeA | <i>Bocconia frutescens</i>     | Papaveraceae        | Ranunculales         |
| BofrMFT   | comp56255_c0_seq1        | UdeA | <i>Bocconia frutescens</i>     | Papaveraceae        | Ranunculales         |
| BrauFT1_1 | TRINITY_DN50312_c0_g1_i1 | UdeA | <i>Brunfelsia australis</i>    | Solanaceae          | Solanales            |
| BrauFT1_2 | TRINITY_DN45017_c0_g1_i1 | UdeA | <i>Brunfelsia australis</i>    | Solanaceae          | Solanales            |
| BrauFT1_3 | TRINITY_DN45017_c0_g2_i1 | UdeA | <i>Brunfelsia australis</i>    | Solanaceae          | Solanales            |
| BrauFT1_4 | TRINITY_DN46075_c0_g1_i1 | UdeA | <i>Brunfelsia australis</i>    | Solanaceae          | Solanales            |
| BrauFT1_5 | TRINITY_DN51421_c0_g1_i1 | UdeA | <i>Brunfelsia australis</i>    | Solanaceae          | Solanales            |
| BrauFT1_6 | TRINITY_DN79559_c0_g3_i1 | UdeA | <i>Brunfelsia australis</i>    | Solanaceae          | Solanales            |
| BrauFT1_7 | TRINITY_DN79559_c0_g1_i1 | UdeA | <i>Brunfelsia australis</i>    | Solanaceae          | Solanales            |
| BrauFT1_8 | TRINITY_DN44401_c0_g1_i1 | UdeA | <i>Brunfelsia australis</i>    | Solanaceae          | Solanales            |
| BrauFT1_9 | TRINITY_DN44401_c0_g1_i2 | UdeA | <i>Brunfelsia australis</i>    | Solanaceae          | Solanales            |
| BrauMFT1  | TRINITY_DN81540_c0_g1_i1 | UdeA | <i>Brunfelsia australis</i>    | Solanaceae          | Solanales            |
| BrauMFT2  | TRINITY_DN25212_c0_g1_i1 | UdeA | <i>Brunfelsia australis</i>    | Solanaceae          | Solanales            |
| BvBFT1    | HM448916.1               | NCBI | <i>Beta vulgaris</i>           | Amaranthaceae       | Caryophyllales       |
| BvCEN1    | HM448914.1               | NCBI | <i>Beta vulgaris</i>           | Amaranthaceae       | Caryophyllales       |
| BvFT1     | HM448910.1               | NCBI | <i>Beta vulgaris</i>           | Amaranthaceae       | Caryophyllales       |



|          |                              |           |                              |               |                |
|----------|------------------------------|-----------|------------------------------|---------------|----------------|
| BvFT2    | HM448912.1                   | NCBI      | <i>Beta vulgaris</i>         | Amaranthaceae | Caryophyllales |
| CapaBFT  | evm.model.supercontig_107.28 | Phytozome | <i>Carica papaya</i>         | Caricaceae    | Brassicales    |
| CapaCEN  | evm.model.supercontig_32.19  | Phytozome | <i>Carica papaya</i>         | Caricaceae    | Brassicales    |
| CapaFT1  | evm.TU.contig_32595.1        | Phytozome | <i>Carica papaya</i>         | Caricaceae    | Brassicales    |
| CapaMFT1 | evm.model.supercontig_3387.2 | Phytozome | <i>Carica papaya</i>         | Caricaceae    | Brassicales    |
| CapaMFT2 | evm.model.supercontig_3.421  | Phytozome | <i>Carica papaya</i>         | Caricaceae    | Brassicales    |
| CapaTFL1 | evm.TU.contig_45053.1        | Phytozome | <i>Carica papaya</i>         | Caricaceae    | Brassicales    |
| CatrFT1B | c14428_g1_i1                 | UdeA      | <i>Cattleya trianae</i>      | Orchidaceae   | Asparagales    |
| CatrFT1C | c4094_g1_i1                  | UdeA      | <i>Cattleya trianae</i>      | Orchidaceae   | Asparagales    |
| CatrFT2A | c7156_g1_i1                  | UdeA      | <i>Cattleya trianae</i>      | Orchidaceae   | Asparagales    |
| CatrTFL1 | c25489_g1_i1                 | UdeA      | <i>Cattleya trianae</i>      | Orchidaceae   | Asparagales    |
| CeFT     | HM803115.1                   | NCBI      | <i>Cymbidium ensifolium</i>  | Orchidaceae   | Asparagales    |
| CgFTa    | HM106985.1                   | NCBI      | <i>Cymbidium goeringii</i>   | Orchidaceae   | Asparagales    |
| CgFTb    | HM120863.1                   | NCBI      | <i>Cymbidium goeringii</i>   | Orchidaceae   | Asparagales    |
| ChmaCEN1 | XMVD_scaffold_2043252        | 1KP       | <i>Chelidonium majus</i>     | Papaveraceae  | Ranunculales   |
| ChmaCEN2 | XMVD_scaffold_2010849        | 1KP       | <i>Chelidonium majus</i>     | Papaveraceae  | Ranunculales   |
| CiquCEN  | BGZG_scaffold_2061341        | 1KP       | <i>Cissus quadrangularis</i> | Vitaceae      | Vitales        |
| CiquFT1  | BGZG_scaffold_2052450        | 1KP       | <i>Cissus quadrangularis</i> | Vitaceae      | Vitales        |

# Supplementary Material

|            |                |             |                               |               |              |
|------------|----------------|-------------|-------------------------------|---------------|--------------|
| CsFT       | HM120862.1     | NCBI        | <i>Cymbidium sinense</i>      | Orchidaceae   | Asparagales  |
| CusaBFT    | Cucsa.250860.1 | Phytozome   | <i>Cucumis sativus</i>        | Cucurbitaceae | Cucurbitales |
| CusaCEN    | Cucsa.385120.1 | Phytozome   | <i>Cucumis sativus</i>        | Cucurbitaceae | Cucurbitales |
| CusaFT1    | Cucsa.356340.1 | Phytozome   | <i>Cucumis sativus</i>        | Cucurbitaceae | Cucurbitales |
| CusaMFT1   | Cucsa.126210.1 | Phytozome   | <i>Cucumis sativus</i>        | Cucurbitaceae | Cucurbitales |
| CusaMFT2   | Cucsa.242690.1 | Phytozome   | <i>Cucumis sativus</i>        | Cucurbitaceae | Cucurbitales |
| CusaTFL1_1 | Cucsa.241060.1 | Phytozome   | <i>Cucumis sativus</i>        | Cucurbitaceae | Cucurbitales |
| CusaTFL1_2 | Cucsa.083330.1 | Phytozome   | <i>Cucumis sativus</i>        | Cucurbitaceae | Cucurbitales |
| CyenFT1A1  | CETC001271     | ORCHIDSTR A | <i>Cymbidium ensifolium</i>   | Orchidaceae   | Asparagales  |
| CyenFT1A2  | CETC001272     | ORCHIDSTR A | <i>Cymbidium ensifolium</i>   | Orchidaceae   | Asparagales  |
| CyenFT1B   | CETC024003     | ORCHIDSTR A | <i>Cymbidium ensifolium</i>   | Orchidaceae   | Asparagales  |
| CyenFT2A   | CETC024410     | ORCHIDSTR A | <i>Cymbidium ensifolium</i>   | Orchidaceae   | Asparagales  |
| CyfaFT2A   | HQ164434.1     | NCBI        | <i>Cymbidium faberi</i>       | Orchidaceae   | Asparagales  |
| CyfaFT2B1  | JQ796076.1     | NCBI        | <i>Cymbidium faberi</i>       | Orchidaceae   | Asparagales  |
| CyfaFT2B2  | KC138734.1     | NCBI        | <i>Cymbidium faberi</i>       | Orchidaceae   | Asparagales  |
| CyfoFT1B   | CFTC011795     | ORCHIDSTR A | <i>Cypripedium formosanum</i> | Orchidaceae   | Asparagales  |

|           |                     |                |                                      |             |             |
|-----------|---------------------|----------------|--------------------------------------|-------------|-------------|
| CyfoFT2C  | CFTC014733          | ORCHIDSTR<br>A | <i>Cypripedium<br/>formosanum</i>    | Orchidaceae | Asparagales |
| CyfoMFT   | CFTC022341          | ORCHIDSTR<br>A | <i>Cypripedium<br/>formosanum</i>    | Orchidaceae | Asparagales |
| CyhcFT2B  | KF669643.1          | NCBI           | <i>Cymbidium<br/>hybrid cultivar</i> | Orchidaceae | Asparagales |
| CysgFT2C  | Unigene90895_Ch_fb  | Orchidbase     | <i>Cypripedium<br/>singchii</i>      | Orchidaceae | Asparagales |
| CysgMFT   | Unigene103006_Ch_fb | Orchidbase     | <i>Cypripedium<br/>singchii</i>      | Orchidaceae | Asparagales |
| CysiFT1A  | CSTC003002          | ORCHIDSTR<br>A | <i>Cymbidium<br/>sinense</i>         | Orchidaceae | Asparagales |
| CysiFT2A  | Unigene91310_Cym_fb | Orchidbase     | <i>Cymbidium<br/>sinense</i>         | Orchidaceae | Asparagales |
| DacaBFT   | DCAR_020239         | Phytozome      | <i>Daucus carota</i>                 | Apiaceae    | Apiales     |
| DacaCEN1  | DCAR_012187         | Phytozome      | <i>Daucus carota</i>                 | Apiaceae    | Apiales     |
| DacaCEN2  | DCAR_010360         | Phytozome      | <i>Daucus carota</i>                 | Apiaceae    | Apiales     |
| DacaCEN3  | DCAR_006159         | Phytozome      | <i>Daucus carota</i>                 | Apiaceae    | Apiales     |
| DacaFT1   | DCAR_023904         | Phytozome      | <i>Daucus carota</i>                 | Apiaceae    | Apiales     |
| DecaFT1A1 | XM_020847639.1      | NCBI           | <i>Dendrobium<br/>catenatum</i>      | Orchidaceae | Asparagales |
| DecaFT1A2 | XM_020847692.1      | NCBI           | <i>Dendrobium<br/>catenatum</i>      | Orchidaceae | Asparagales |
| DecaFT1A3 | XM_020819681.1      | NCBI           | <i>Dendrobium<br/>catenatum</i>      | Orchidaceae | Asparagales |
| DecaFT1B1 | XM_020817371.1      | NCBI           | <i>Dendrobium<br/>catenatum</i>      | Orchidaceae | Asparagales |
| DecaFT1B2 | XM_020846691.1      | NCBI           | <i>Dendrobium<br/>catenatum</i>      | Orchidaceae | Asparagales |
| DecaFT1C1 | XR_002305210.1      | NCBI           | <i>Dendrobium<br/>catenatum</i>      | Orchidaceae | Asparagales |

# Supplementary Material

|           |                          |             |                                   |             |             |
|-----------|--------------------------|-------------|-----------------------------------|-------------|-------------|
| DecaFT1C2 | XM_020846707.1           | NCBI        | <i>Dendrobium catenatum</i>       | Orchidaceae | Asparagales |
| DecaFT2A  | XM_020849885.1           | NCBI        | <i>Dendrobium catenatum</i>       | Orchidaceae | Asparagales |
| DecaFT2C  | XM_020839137.1           | NCBI        | <i>Dendrobium catenatum</i>       | Orchidaceae | Asparagales |
| DecaMFT   | XM_020843384.1           | NCBI        | <i>Dendrobium catenatum</i>       | Orchidaceae | Asparagales |
| DenoFT1A  | DNTC002854               | ORCHIDSTR A | <i>Dendrobium nobile</i>          | Orchidaceae | Asparagales |
| DenoFT2A  | DNTC004082               | ORCHIDSTR A | <i>Dendrobium nobile</i>          | Orchidaceae | Asparagales |
| DenoMFT   | DNTC002178               | ORCHIDSTR A | <i>Dendrobium nobile</i>          | Orchidaceae | Asparagales |
| DOFT      | MF063061.1               | NCBI        | <i>Dendrobium</i> hybrid cultivar | Orchidaceae | Asparagales |
| DrelFT2C  | XZME_scaffold_2030044    | 1KP         | <i>Drakaea elastica</i>           | Orchidaceae | Asparagales |
| DrwiBFT   | WKSU_scaffold_2129761    | 1KP         | <i>Drimys winteri</i>             | Winteraceae | Canellales  |
| DrwiCEN   | WKSU_scaffold_2031388    | 1KP         | <i>Drimys winteri</i>             | Winteraceae | Canellales  |
| ElauFT1A  | TRINITY_DN16742_c0_g1_i2 | UdeA        | <i>Elleanthus aurantiacus</i>     | Orchidaceae | Asparagales |
| ElauFT1C1 | TRINITY_DN1688_c0_g1_i2  | UdeA        | <i>Elleanthus aurantiacus</i>     | Orchidaceae | Asparagales |
| ElauFT1C2 | TRINITY_DN1688_c0_g1_i1  | UdeA        | <i>Elleanthus aurantiacus</i>     | Orchidaceae | Asparagales |
| ElauFT2A1 | TRINITY_DN22498_c3_g1_i2 | UdeA        | <i>Elleanthus aurantiacus</i>     | Orchidaceae | Asparagales |
| ElauFT2A2 | TRINITY_DN22498_c3_g1_i1 | UdeA        | <i>Elleanthus aurantiacus</i>     | Orchidaceae | Asparagales |
| ElauMFT   | TRINITY_DN22697_c3_g1_i1 | UdeA        | <i>Elleanthus aurantiacus</i>     | Orchidaceae | Asparagales |

|           |                          |                |                               |             |             |
|-----------|--------------------------|----------------|-------------------------------|-------------|-------------|
| ErpuFT1B  | EPTC070766               | ORCHIDSTR<br>A | <i>Erycina<br/>pusilla</i>    | Orchidaceae | Asparagales |
| ErpuFT1C  | EPTC022265               | ORCHIDSTR<br>A | <i>Erycina<br/>pusilla</i>    | Orchidaceae | Asparagales |
| FrveBFT   | mrna13304.1-v1.0-hybrid  | Phytozome      | <i>Fragaria<br/>vesca</i>     | Rosaceae    | Rosales     |
| FrveCEN   | mrna21992.1-v1.0-hybrid  | Phytozome      | <i>Fragaria<br/>vesca</i>     | Rosaceae    | Rosales     |
| FrveFT1_1 | mrna28959.1-v1.0-hybrid  | Phytozome      | <i>Fragaria<br/>vesca</i>     | Rosaceae    | Rosales     |
| FrveFT1_2 | mrna21535.1-v1.0-hybrid  | Phytozome      | <i>Fragaria<br/>vesca</i>     | Rosaceae    | Rosales     |
| FrveMFT   | mrna09405.1-v1.0-hybrid  | Phytozome      | <i>Fragaria<br/>vesca</i>     | Rosaceae    | Rosales     |
| FrveTFL1  | mrna30276.1-v1.0-hybrid  | Phytozome      | <i>Fragaria<br/>vesca</i>     | Rosaceae    | Rosales     |
| GaelFT1B1 | GETC021275               | ORCHIDSTR<br>A | <i>Gastrodia<br/>elata</i>    | Orchidaceae | Asparagales |
| GaelFT1B2 | GETC027491               | ORCHIDSTR<br>A | <i>Gastrodia<br/>elata</i>    | Orchidaceae | Asparagales |
| GaelFT2A  | GETC013754               | ORCHIDSTR<br>A | <i>Gastrodia<br/>elata</i>    | Orchidaceae | Asparagales |
| GafaTFL1  | Unigene12193_Ga_fb       | Orchidbase     | <i>Galeola faberi</i>         | Orchidaceae | Asparagales |
| GopuFT1B  | VTUS_scaffold_2004082    | 1KP            | <i>Goodyera<br/>pubescens</i> | Orchidaceae | Asparagales |
| GopuFT2A  | VTUS_scaffold_2031753    | 1KP            | <i>Goodyera<br/>pubescens</i> | Orchidaceae | Asparagales |
| GoscFT1A  | TRINITY_DN13863_c0_g1_i1 | UdeA           | <i>Gomphichis<br/>scaposa</i> | Orchidaceae | Asparagales |
| GoscFT1B  | TRINITY_DN23199_c0_g1_i2 | UdeA           | <i>Gomphichis<br/>scaposa</i> | Orchidaceae | Asparagales |
| GoscFT2A1 | TRINITY_DN19348_c0_g1_i1 | UdeA           | <i>Gomphichis<br/>scaposa</i> | Orchidaceae | Asparagales |

# Supplementary Material

|           |                          |            |                            |              |             |
|-----------|--------------------------|------------|----------------------------|--------------|-------------|
| GoscFT2A2 | TRINITY_DN19348_c0_g1_i2 | UdeA       | <i>Gomphichis scaposa</i>  | Orchidaceae  | Asparagales |
| GoscFT2C  | TRINITY_DN34518_c0_g1_i1 | UdeA       | <i>Gomphichis scaposa</i>  | Orchidaceae  | Asparagales |
| GoscMFT1  | TRINITY_DN14314_c0_g1_i1 | UdeA       | <i>Gomphichis scaposa</i>  | Orchidaceae  | Asparagales |
| GoscMFT2  | TRINITY_DN14314_c0_g1_i2 | UdeA       | <i>Gomphichis scaposa</i>  | Orchidaceae  | Asparagales |
| GoscTFL1  | TRINITY_DN30644_c0_g1_i1 | UdeA       | <i>Gomphichis scaposa</i>  | Orchidaceae  | Asparagales |
| GtFT1     | AB605176.1               | NCBI       | <i>Gentiana triflora</i>   | Gentianaceae | Gentianales |
| GtFT2     | AB605177.1               | NCBI       | <i>Gentiana triflora</i>   | Gentianaceae | Gentianales |
| GtTFL1    | AB605178.1               | NCBI       | <i>Gentiana triflora</i>   | Gentianaceae | Gentianales |
| HadeFT2A  | Unigene18573_Ha_fb       | Orchidbase | <i>Habenaria delavayi</i>  | Orchidaceae  | Asparagales |
| HadeTFL1  | Unigene15403_Ha_fb       | Orchidbase | <i>Habenaria delavayi</i>  | Orchidaceae  | Asparagales |
| HadiFT1B  | LELS_scaffold_2082772    | 1KP        | <i>Haemaria discolor</i>   | Orchidaceae  | Asparagales |
| HadiFT2A  | LELS_scaffold_2087437    | 1KP        | <i>Haemaria discolor</i>   | Orchidaceae  | Asparagales |
| HefoFT2A  | Unigene85702_Hem         | Orchidbase | <i>Hemipilia forrestii</i> | Orchidaceae  | Asparagales |
| HefoFT2C1 | Unigene102058_Hem        | Orchidbase | <i>Hemipilia forrestii</i> | Orchidaceae  | Asparagales |
| HefoFT2C2 | Unigene82148_Hem         | Orchidbase | <i>Hemipilia forrestii</i> | Orchidaceae  | Asparagales |
| HefoTFL1  | Unigene16939_Hem         | Orchidbase | <i>Hemipilia forrestii</i> | Orchidaceae  | Asparagales |

|            |                       |      |                            |                |                  |
|------------|-----------------------|------|----------------------------|----------------|------------------|
| HovuMFT1   | AL508112              | NCBI | <i>Hordeum vulgare</i>     | Poaceae        | Poales           |
| HovuMFT2   | BG417566              | NCBI | <i>Hordeum vulgare</i>     | Poaceae        | Poales           |
| HovuTFL1   | AB447465              | NCBI | <i>Hordeum vulgare</i>     | Poaceae        | Poales           |
| HydeFT1B1  | c89267_g1_i1          | UdeA | <i>Hypoxis decumbens</i>   | Hypoxidaceae   | Asparagales      |
| HydeFT1B2  | c88391_g1_i1          | UdeA | <i>Hypoxis decumbens</i>   | Hypoxidaceae   | Asparagales      |
| HydeFT1C   | c9010_g1_i1           | UdeA | <i>Hypoxis decumbens</i>   | Hypoxidaceae   | Asparagales      |
| HydeFT2    | c14809_g1_i1          | UdeA | <i>Hypoxis decumbens</i>   | Hypoxidaceae   | Asparagales      |
| HydeFT2A1  | c23061_g2_i2          | UdeA | <i>Hypoxis decumbens</i>   | Hypoxidaceae   | Asparagales      |
| HydeFT2A2  | c23061_g2_i1          | UdeA | <i>Hypoxis decumbens</i>   | Hypoxidaceae   | Asparagales      |
| HydeFT2C1  | c23061_g1_i2          | UdeA | <i>Hypoxis decumbens</i>   | Hypoxidaceae   | Asparagales      |
| HydeFT2C2  | c23061_g1_i1          | UdeA | <i>Hypoxis decumbens</i>   | Hypoxidaceae   | Asparagales      |
| HydeMFT1   | c20931_g1_i1          | UdeA | <i>Hypoxis decumbens</i>   | Hypoxidaceae   | Asparagales      |
| HydeMFT2   | c20456_g1_i1          | UdeA | <i>Hypoxis decumbens</i>   | Hypoxidaceae   | Asparagales      |
| HydeMFT3   | c20456_g2_i1          | UdeA | <i>Hypoxis decumbens</i>   | Hypoxidaceae   | Asparagales      |
| HydeTFL1_1 | c23090_g1_i1          | UdeA | <i>Hypoxis decumbens</i>   | Hypoxidaceae   | Asparagales      |
| HydeTFL1_2 | c102156_g1_i1         | UdeA | <i>Hypoxis decumbens</i>   | Hypoxidaceae   | Asparagales      |
| KaheMFT    | NWMY_scaffold_2062140 | 1KP  | <i>Kadsura heteroclita</i> | Schisandraceae | Austrobaileyales |

# Supplementary Material

|           |                          |      |                             |             |             |
|-----------|--------------------------|------|-----------------------------|-------------|-------------|
| LIFT      | MG121856.1               | NCBI | <i>Lilium longiflorum</i>   | Liliaceae   | Liliales    |
| LopeTFL1  | AF316419                 | NCBI | <i>Lolium perenne</i>       | Poaceae     | Poales      |
| MaaufT1A1 | TRINITY_DN14829_c0_g1_i1 | UdeA | <i>Maxillaria aurea</i>     | Orchidaceae | Asparagales |
| MaaufT1A2 | TRINITY_DN14829_c0_g1_i2 | UdeA | <i>Maxillaria aurea</i>     | Orchidaceae | Asparagales |
| MaaufT1B4 | TRINITY_DN16463_c0_g3_i2 | UdeA | <i>Maxillaria aurea</i>     | Orchidaceae | Asparagales |
| MaaufT1B1 | TRINITY_DN15080_c0_g1_i3 | UdeA | <i>Maxillaria aurea</i>     | Orchidaceae | Asparagales |
| MaaufT1B2 | TRINITY_DN15080_c0_g1_i1 | UdeA | <i>Maxillaria aurea</i>     | Orchidaceae | Asparagales |
| MaaufT1B3 | TRINITY_DN15080_c0_g1_i2 | UdeA | <i>Maxillaria aurea</i>     | Orchidaceae | Asparagales |
| MaaufT1C1 | TRINITY_DN15069_c0_g1_i1 | UdeA | <i>Maxillaria aurea</i>     | Orchidaceae | Asparagales |
| MaaufT1C2 | TRINITY_DN15069_c0_g1_i2 | UdeA | <i>Maxillaria aurea</i>     | Orchidaceae | Asparagales |
| MaaufT2A1 | TRINITY_DN15519_c0_g1_i2 | UdeA | <i>Maxillaria aurea</i>     | Orchidaceae | Asparagales |
| MaaufT2A2 | TRINITY_DN15519_c0_g1_i1 | UdeA | <i>Maxillaria aurea</i>     | Orchidaceae | Asparagales |
| MaaufT1A3 | TRINITY_DN14829_c0_g1_i3 | UdeA | <i>Maxillaria aurea</i>     | Orchidaceae | Asparagales |
| MaaufT2C  | TRINITY_DN25818_c0_g1_i1 | UdeA | <i>Maxillaria aurea</i>     | Orchidaceae | Asparagales |
| MaaufT1A  | TRINITY_DN53367_c0_g1_i1 | UdeA | <i>Masdevallia coccinea</i> | Orchidaceae | Asparagales |
| MaaufT1B  | TRINITY_DN36146_c0_g1_i1 | UdeA | <i>Masdevallia coccinea</i> | Orchidaceae | Asparagales |



|          |                          |           |                                 |             |              |
|----------|--------------------------|-----------|---------------------------------|-------------|--------------|
| MacFT1C  | TRINITY_DN23174_c0_g1_i2 | UdeA      | <i>Masdevallia coccinea</i>     | Orchidaceae | Asparagales  |
| MacFT2A1 | TRINITY_DN23542_c0_g1_i3 | UdeA      | <i>Masdevallia coccinea</i>     | Orchidaceae | Asparagales  |
| MacFT2A2 | TRINITY_DN23542_c0_g1_i2 | UdeA      | <i>Masdevallia coccinea</i>     | Orchidaceae | Asparagales  |
| MaFT1    | GSMUA_Achr9T07900_001    | Phytozome | <i>Musa acuminata</i>           | Musaceae    | Zingiberales |
| MaFT10   | GSMUA_Achr2T20900_001    | Phytozome | <i>Musa acuminata</i>           | Musaceae    | Zingiberales |
| MaFT11   | GSMUA_Achr10T21760_001   | Phytozome | <i>Musa acuminata</i>           | Musaceae    | Zingiberales |
| MaFT12   | GSMUA_Achr5T06420_001    | Phytozome | <i>Musa acuminata</i>           | Musaceae    | Zingiberales |
| MaFT3    | GSMUA_Achr5T06600_001    | Phytozome | <i>Musa acuminata</i>           | Musaceae    | Zingiberales |
| MaFT4    | GSMUA_Achr2T19360_001    | Phytozome | <i>Musa acuminata</i>           | Musaceae    | Zingiberales |
| MaFT5    | GSMUA_Achr4T08540_001    | Phytozome | <i>Musa acuminata</i>           | Musaceae    | Zingiberales |
| MaFT6    | GSMUA_Achr2T19310_001    | Phytozome | <i>Musa acuminata</i>           | Musaceae    | Zingiberales |
| MaFT7    | GSMUA_Achr2T05870_001    | Phytozome | <i>Musa acuminata</i>           | Musaceae    | Zingiberales |
| MaFT9    | GSMUA_Achr3T02730_001    | Phytozome | <i>Musa acuminata</i>           | Musaceae    | Zingiberales |
| MaTSF1   | GSMUA_Achr1T17050_001    | Phytozome | <i>Musa acuminata</i>           | Musaceae    | Zingiberales |
| MaTSF2   | GSMUA_Achr3T21510_001    | Phytozome | <i>Musa acuminata</i>           | Musaceae    | Zingiberales |
| MaweFT1A | TRINITY_DN34103_c0_g1_i1 | UdeA      | <i>Masdevallia wendlandiana</i> | Orchidaceae | Asparagales  |
| MaweFT1B | TRINITY_DN4104_c0_g1_i1  | UdeA      | <i>Masdevallia wendlandiana</i> | Orchidaceae | Asparagales  |

# Supplementary Material

|               |                          |           |                                     |             |             |
|---------------|--------------------------|-----------|-------------------------------------|-------------|-------------|
| MaweFT1C<br>1 | TRINITY_DN12844_c0_g1_i1 | UdeA      | <i>Masdevallia<br/>wendlandiana</i> | Orchidaceae | Asparagales |
| MaweFT1C<br>2 | TRINITY_DN12844_c0_g1_i2 | UdeA      | <i>Masdevallia<br/>wendlandiana</i> | Orchidaceae | Asparagales |
| MaweFT1C<br>3 | TRINITY_DN12844_c0_g1_i3 | UdeA      | <i>Masdevallia<br/>wendlandiana</i> | Orchidaceae | Asparagales |
| MaweFT2A<br>1 | TRINITY_DN12012_c0_g1_i1 | UdeA      | <i>Masdevallia<br/>wendlandiana</i> | Orchidaceae | Asparagales |
| MaweFT2A<br>2 | TRINITY_DN12012_c0_g1_i3 | UdeA      | <i>Masdevallia<br/>wendlandiana</i> | Orchidaceae | Asparagales |
| MaweFT2A<br>3 | TRINITY_DN12012_c0_g1_i2 | UdeA      | <i>Masdevallia<br/>wendlandiana</i> | Orchidaceae | Asparagales |
| MaweTFL1      | TRINITY_DN6371_c0_g1_i1  | UdeA      | <i>Masdevallia<br/>wendlandiana</i> | Orchidaceae | Asparagales |
| MayuFT1A<br>1 | JSAG_scaffold_2045808    | 1KP       | <i>Masdevallia<br/>yuangensis</i>   | Orchidaceae | Asparagales |
| MayuFT1A<br>2 | JSAG_scaffold_2073319    | 1KP       | <i>Masdevallia<br/>yuangensis</i>   | Orchidaceae | Asparagales |
| MayuFT1B      | JSAG_scaffold_2002272    | 1KP       | <i>Masdevallia<br/>yuangensis</i>   | Orchidaceae | Asparagales |
| MayuFT2A<br>1 | JSAG_scaffold_2074961    | 1KP       | <i>Masdevallia<br/>yuangensis</i>   | Orchidaceae | Asparagales |
| MayuFT2A<br>2 | JSAG_scaffold_2065793    | 1KP       | <i>Masdevallia<br/>yuangensis</i>   | Orchidaceae | Asparagales |
| MetrBFT       | Medtr0020s0120.1         | Phytozome | <i>Medicago<br/>truncatula</i>      | Fabaceae    | Fabales     |
| MetrCEN       | Medtr2g086270.1          | Phytozome | <i>Medicago<br/>truncatula</i>      | Fabaceae    | Fabales     |
| MetrFT1_1     | Medtr7g085040.1          | Phytozome | <i>Medicago<br/>truncatula</i>      | Fabaceae    | Fabales     |
| MetrFT1_2     | Medtr7g025450.1          | Phytozome | <i>Medicago<br/>truncatula</i>      | Fabaceae    | Fabales     |

|            |                          |           |                             |             |             |
|------------|--------------------------|-----------|-----------------------------|-------------|-------------|
| MetrFT1_3  | Medtr7g006630.1          | Phytozome | <i>Medicago truncatula</i>  | Fabaceae    | Fabales     |
| MetrFT1_4  | Medtr7g006690.1          | Phytozome | <i>Medicago truncatula</i>  | Fabaceae    | Fabales     |
| MetrFT1_5  | Medtr7g085020.1          | Phytozome | <i>Medicago truncatula</i>  | Fabaceae    | Fabales     |
| MetrFT1_6  | Medtr7g084970.1          | Phytozome | <i>Medicago truncatula</i>  | Fabaceae    | Fabales     |
| MetrFT1_7  | Medtr6g033040.1          | Phytozome | <i>Medicago truncatula</i>  | Fabaceae    | Fabales     |
| MetrMFT    | Medtr8g106840.1          | Phytozome | <i>Medicago truncatula</i>  | Fabaceae    | Fabales     |
| MetrTFL1_1 | Medtr7g104460.1          | Phytozome | <i>Medicago truncatula</i>  | Fabaceae    | Fabales     |
| MetrTFL1_2 | Medtr1g060190.1          | Phytozome | <i>Medicago truncatula</i>  | Fabaceae    | Fabales     |
| MiroFT1A1  | TRINITY_DN17560_c0_g1_i1 | UdeA      | <i>Miltoniopsis roezlii</i> | Orchidaceae | Asparagales |
| MiroFT1A2  | TRINITY_DN10084_c0_g1_i1 | UdeA      | <i>Miltoniopsis roezlii</i> | Orchidaceae | Asparagales |
| MiroFT1B1  | TRINITY_DN24380_c0_g1_i1 | UdeA      | <i>Miltoniopsis roezlii</i> | Orchidaceae | Asparagales |
| MiroFT1B2  | TRINITY_DN15222_c0_g1_i3 | UdeA      | <i>Miltoniopsis roezlii</i> | Orchidaceae | Asparagales |
| MiroFT1C1  | TRINITY_DN6529_c0_g1_i1  | UdeA      | <i>Miltoniopsis roezlii</i> | Orchidaceae | Asparagales |
| MiroFT1C2  | TRINITY_DN6529_c0_g1_i2  | UdeA      | <i>Miltoniopsis roezlii</i> | Orchidaceae | Asparagales |
| MiroFT2A1  | TRINITY_DN17260_c4_g1_i2 | UdeA      | <i>Miltoniopsis roezlii</i> | Orchidaceae | Asparagales |
| MiroFT2A2  | TRINITY_DN17260_c4_g1_i1 | UdeA      | <i>Miltoniopsis roezlii</i> | Orchidaceae | Asparagales |
| MiroFT2A3  | TRINITY_DN17260_c4_g1_i4 | UdeA      | <i>Miltoniopsis roezlii</i> | Orchidaceae | Asparagales |

# Supplementary Material

|            |                               |            |                              |               |              |
|------------|-------------------------------|------------|------------------------------|---------------|--------------|
| MiroFT2C   | TRINITY_DN17322_c1_g5_i5      | UdeA       | <i>Miltoniopsis roezlii</i>  | Orchidaceae   | Asparagales  |
| MiroTFL1   | TRINITY_DN28320_c0_g1_i1      | UdeA       | <i>Miltoniopsis roezlii</i>  | Orchidaceae   | Asparagales  |
| MuacBFT1   | GSMUA_Achr5T20040_001         | Phytozome  | <i>Musa acuminata</i>        | Musaceae      | Zingiberales |
| MuacBFT2   | GSMUA_Achr11T21720_001        | Phytozome  | <i>Musa acuminata</i>        | Musaceae      | Zingiberales |
| MuacMFT1   | GSMUA_Achr6T09410_001         | Phytozome  | <i>Musa acuminata</i>        | Musaceae      | Zingiberales |
| MuacMFT2   | GSMUA_AchrUn_randomT20510_001 | Phytozome  | <i>Musa acuminata</i>        | Musaceae      | Zingiberales |
| MuacMFT3   | GSMUA_Achr3T20880_001         | Phytozome  | <i>Musa acuminata</i>        | Musaceae      | Zingiberales |
| MuacTFL1_1 | GSMUA_Achr10T15580_001        | Phytozome  | <i>Musa acuminata</i>        | Musaceae      | Zingiberales |
| MuacTFL1_2 | GSMUA_Achr3T03070_001         | Phytozome  | <i>Musa acuminata</i>        | Musaceae      | Zingiberales |
| MuacTFL1_3 | GSMUA_Achr10T10290_001        | Phytozome  | <i>Musa acuminata</i>        | Musaceae      | Zingiberales |
| MuacTFL1_4 | GSMUA_Achr3T22720_001         | Phytozome  | <i>Musa acuminata</i>        | Musaceae      | Zingiberales |
| MuacTFL1_5 | GSMUA_Achr8T07730_001         | Phytozome  | <i>Musa acuminata</i>        | Musaceae      | Zingiberales |
| MyfrBFT1   | OBPL_scaffold_2032672         | 1KP        | <i>Myristica fragrans</i>    | Myristicaceae | Magnoliales  |
| MyfrBFT2   | OBPL_scaffold_2005500         | 1KP        | <i>Myristica fragrans</i>    | Myristicaceae | Magnoliales  |
| NemaFT1A   | Unigene3549_Ne_fb             | Orchidbase | <i>Neuwiedia malipoensis</i> | Orchidaceae   | Asparagales  |
| NemaFT2C   | Unigene126803_Ne_fb           | Orchidbase | <i>Neuwiedia malipoensis</i> | Orchidaceae   | Asparagales  |

|          |                          |             |                              |             |             |
|----------|--------------------------|-------------|------------------------------|-------------|-------------|
| NemaMFT  | Unigene133751_Ne_fb      | Orchidbase  | <i>Neuwiedia malipoensis</i> | Orchidaceae | Asparagales |
| NezoFT1A | NZTC028978               | ORCHIDSTR A | <i>Neuwiedia zollingeri</i>  | Orchidaceae | Asparagales |
| NezoFT1B | NZTC007962               | ORCHIDSTR A | <i>Neuwiedia zollingeri</i>  | Orchidaceae | Asparagales |
| NezoFT1C | NZTC020018               | ORCHIDSTR A | <i>Neuwiedia zollingeri</i>  | Orchidaceae | Asparagales |
| NezoFT2A | NZTC015683               | ORCHIDSTR A | <i>Neuwiedia zollingeri</i>  | Orchidaceae | Asparagales |
| NezoFT2C | NZTC028903               | ORCHIDSTR A | <i>Neuwiedia zollingeri</i>  | Orchidaceae | Asparagales |
| NezoMFT  | NZTC024620               | ORCHIDSTR A | <i>Neuwiedia zollingeri</i>  | Orchidaceae | Asparagales |
| NitaBFT  | AF145259                 | NCBI        | <i>Nicotiana tabacum</i>     | Solanaceae  | Solanales   |
| NitaCEN1 | AF145260                 | NCBI        | <i>Nicotiana tabacum</i>     | Solanaceae  | Solanales   |
| NitaCEN2 | AF145261                 | NCBI        | <i>Nicotiana tabacum</i>     | Solanaceae  | Solanales   |
| NitaCEN3 | AF145262                 | NCBI        | <i>Nicotiana tabacum</i>     | Solanaceae  | Solanales   |
| NtFT1    | JX679067                 | NCBI        | <i>Nicotiana tabacum</i>     | Solanaceae  | Solanales   |
| NtFT2    | JX679068                 | NCBI        | <i>Nicotiana tabacum</i>     | Solanaceae  | Solanales   |
| NtFT3    | JX679069                 | NCBI        | <i>Nicotiana tabacum</i>     | Solanaceae  | Solanales   |
| NtFT4    | JX679070                 | NCBI        | <i>Nicotiana tabacum</i>     | Solanaceae  | Solanales   |
| OnciFT1A | TRINITY_DN22572_c0_g1_i1 | UdeA        | <i>Oncidium Gower Ramsey</i> | Orchidaceae | Asparagales |

# Supplementary Material

|               |                          |                |                                       |             |             |
|---------------|--------------------------|----------------|---------------------------------------|-------------|-------------|
| OnciFT2A      | TRINITY_DN27370_c0_g1_i1 | UdeA           | <i>Oncidium</i><br>Gower<br>Ramsey    | Orchidaceae | Asparagales |
| OnFT          | KJ909968.1               | NCBI           | <i>Oncidium</i><br>Gower<br>Ramsey    | Orchidaceae | Asparagales |
| OnGRFT2A      | EU583502.1               | NCBI           | <i>Oncidium</i><br>Gower<br>Ramsey    | Orchidaceae | Asparagales |
| OnhcFT2B      | KF669642.1               | NCBI           | <i>Oncidium</i><br>hybrid cultivar    | Orchidaceae | Asparagales |
| OnsPFT1C      | CNTZ_scaffold_2040115    | 1KP            | <i>Oncidium</i><br><i>sphacelatum</i> | Orchidaceae | Asparagales |
| OnTFL1        | KM233713.1               | NCBI           | <i>Oncidium</i><br>Gower<br>Ramsey    | Orchidaceae | Asparagales |
| OnTWFT1<br>A1 | TRINITY_DN28096_c0_g1_i1 | UdeA           | <i>Oncidium</i><br>Twinkle            | Orchidaceae | Asparagales |
| OnTWFT1<br>A2 | TRINITY_DN13213_c0_g1_i1 | UdeA           | <i>Oncidium</i><br>Twinkle            | Orchidaceae | Asparagales |
| OnTWFT1B      | TRINITY_DN29823_c0_g1_i1 | UdeA           | <i>Oncidium</i><br>Twinkle            | Orchidaceae | Asparagales |
| OnTWFT1C      | TRINITY_DN15941_c0_g1_i1 | UdeA           | <i>Oncidium</i><br>Twinkle            | Orchidaceae | Asparagales |
| OnTWFT2<br>A1 | TRINITY_DN14463_c0_g1_i2 | UdeA           | <i>Oncidium</i><br>Twinkle            | Orchidaceae | Asparagales |
| OnTWFT2<br>A2 | TRINITY_DN14463_c0_g1_i1 | UdeA           | <i>Oncidium</i><br>Twinkle            | Orchidaceae | Asparagales |
| OnTWFTL1      | TRINITY_DN4222_c0_g1_i1  | UdeA           | <i>Oncidium</i><br>Twinkle            | Orchidaceae | Asparagales |
| OpspFT1B1     | OSTC004790               | ORCHIDSTR<br>A | <i>Ophrys</i><br><i>sphegodes</i>     | Orchidaceae | Asparagales |
| OpspFT1B2     | OSTC004791               | ORCHIDSTR<br>A | <i>Ophrys</i><br><i>sphegodes</i>     | Orchidaceae | Asparagales |

|            |                  |                                |                     |         |        |
|------------|------------------|--------------------------------|---------------------|---------|--------|
| OrzaFT1A1  | XM_015769366.1   | NCBI                           | <i>Oryza sativa</i> | Poaceae | Poales |
| OrzaFT1A2  | XM_015786342.1   | NCBI                           | <i>Oryza sativa</i> | Poaceae | Poales |
| OrzaFT1A3  | LOC_Os01g54490   | Rice Genome Annotation Project | <i>Oryza sativa</i> | Poaceae | Poales |
| OrzaFT1A4  | XM_015785027.1   | NCBI                           | <i>Oryza sativa</i> | Poaceae | Poales |
| OrzaFT1B1  | XM_015777901.1   | NCBI                           | <i>Oryza sativa</i> | Poaceae | Poales |
| OrzaFT1B2  | XM_015771743.1   | NCBI                           | <i>Oryza sativa</i> | Poaceae | Poales |
| OrzaFT1B3  | XM_015762083.1   | NCBI                           | <i>Oryza sativa</i> | Poaceae | Poales |
| OrzaFT1C   | XM_015756421.1   | NCBI                           | <i>Oryza sativa</i> | Poaceae | Poales |
| OrzaFT2B   | XM_015756406.1   | NCBI                           | <i>Oryza sativa</i> | Poaceae | Poales |
| OrzaHd3a   | AB052944.1       | NCBI                           | <i>Oryza sativa</i> | Poaceae | Poales |
| OrzaMFT1   | XM_015779388.1   | NCBI                           | <i>Oryza sativa</i> | Poaceae | Poales |
| OrzaMFT2   | LOC_Os06g30370   | Rice Genome Annotation Project | <i>Oryza sativa</i> | Poaceae | Poales |
| OrzaMFT3   | AK107056         | NCBI                           | <i>Oryza sativa</i> | Poaceae | Poales |
| OrzaRFT1   | LOC_Os06g06300.1 | Rice Genome Annotation Project | <i>Oryza sativa</i> | Poaceae | Poales |
| OrzaTFL1_1 | XM_015762401.1   | NCBI                           | <i>Oryza sativa</i> | Poaceae | Poales |
| OrzaTFL1_2 | XM_015768632.1   | NCBI                           | <i>Oryza sativa</i> | Poaceae | Poales |
| OrzaTFL1_3 | XM_015778658.1   | NCBI                           | <i>Oryza sativa</i> | Poaceae | Poales |
| OrzaTFL1_4 | AF159883         | NCBI                           | <i>Oryza sativa</i> | Poaceae | Poales |
| OrzaTFL1_5 | AF159882         | NCBI                           | <i>Oryza sativa</i> | Poaceae | Poales |

# Supplementary Material

|           |                       |            |                                      |              |              |
|-----------|-----------------------|------------|--------------------------------------|--------------|--------------|
| PaarFT1B  | Unigene93784_Pa_fb    | Orchidbase | <i>Paphiopedilu<br/>m armeniacum</i> | Orchidaceae  | Asparagales  |
| PaarTFL1  | Unigene113364_Pa_fb   | Orchidbase | <i>Paphiopedilu<br/>m armeniacum</i> | Orchidaceae  | Asparagales  |
| PaFT1     | KJ609179.1            | NCBI       | <i>Phalaenopsis<br/>aphrodite</i>    | Orchidaceae  | Asparagales  |
| PaseBFT   | JSVC_scaffold_2014753 | 1KP        | <i>Papaver<br/>setigerum</i>         | Papaveraceae | Ranunculales |
| PaseCEN1  | JSVC_scaffold_2157342 | 1KP        | <i>Papaver<br/>setigerum</i>         | Papaveraceae | Ranunculales |
| PaseCEN2  | STDO_scaffold_2022850 | 1KP        | <i>Papaver<br/>setigerum</i>         | Papaveraceae | Ranunculales |
| PaseCEN3  | STDO_scaffold_2149466 | 1KP        | <i>Papaver<br/>setigerum</i>         | Papaveraceae | Ranunculales |
| PaseCEN4  | STDO_scaffold_2040888 | 1KP        | <i>Papaver<br/>setigerum</i>         | Papaveraceae | Ranunculales |
| PaseFT1_1 | MLPX_scaffold_2006863 | 1KP        | <i>Papaver<br/>setigerum</i>         | Papaveraceae | Ranunculales |
| PaseFT1_2 | MLPX_scaffold_2006865 | 1KP        | <i>Papaver<br/>setigerum</i>         | Papaveraceae | Ranunculales |
| PaseFT1_3 | MLPX_scaffold_2006864 | 1KP        | <i>Papaver<br/>setigerum</i>         | Papaveraceae | Ranunculales |
| PaseFT1_4 | MLPX_scaffold_2006866 | 1KP        | <i>Papaver<br/>setigerum</i>         | Papaveraceae | Ranunculales |
| PaseFT1_5 | STDO_scaffold_2030816 | 1KP        | <i>Papaver<br/>setigerum</i>         | Papaveraceae | Ranunculales |
| PaseFT1_6 | EPRK_scaffold_2026376 | 1KP        | <i>Papaver<br/>setigerum</i>         | Papaveraceae | Ranunculales |
| PaseFT1_7 | FNXH_scaffold_2025908 | 1KP        | <i>Papaver<br/>setigerum</i>         | Papaveraceae | Ranunculales |
| PaseFT1_8 | STDO_scaffold_2000001 | 1KP        | <i>Papaver<br/>setigerum</i>         | Papaveraceae | Ranunculales |



|           |                       |             |                               |              |              |
|-----------|-----------------------|-------------|-------------------------------|--------------|--------------|
| PaseMFT1  | FNXH_scaffold_2005900 | 1KP         | <i>Papaver setigerum</i>      | Papaveraceae | Ranunculales |
| PaseMFT2  | MLPX_scaffold_2006707 | 1KP         | <i>Papaver setigerum</i>      | Papaveraceae | Ranunculales |
| PeFT1     | PEQU_33459            | Orchidbase  | <i>Phalaenopsis equestris</i> | Orchidaceae  | Asparagales  |
| PeFT2     | PEQU_08401            | Orchidbase  | <i>Phalaenopsis equestris</i> | Orchidaceae  | Asparagales  |
| PeFT3     | PEQU_19304            | Orchidbase  | <i>Phalaenopsis equestris</i> | Orchidaceae  | Asparagales  |
| PeFT4     | PEQU_16731            | Orchidbase  | <i>Phalaenopsis equestris</i> | Orchidaceae  | Asparagales  |
| PeFT5     | PEQU_15502            | Orchidbase  | <i>Phalaenopsis equestris</i> | Orchidaceae  | Asparagales  |
| PeFT6     | PEQU_33463            | Orchidbase  | <i>Phalaenopsis equestris</i> | Orchidaceae  | Asparagales  |
| PeFT7     | PEQU_06787            | Orchidbase  | <i>Phalaenopsis equestris</i> | Orchidaceae  | Asparagales  |
| PeMFT     | PEQU_06435            | Orchidbase  | <i>Phalaenopsis equestris</i> | Orchidaceae  | Asparagales  |
| PhapFT1A  | PATC132794            | ORCHIDSTR A | <i>Phalaenopsis aphrodite</i> | Orchidaceae  | Asparagales  |
| PhapFT1B  | PATC058994            | ORCHIDSTR A | <i>Phalaenopsis aphrodite</i> | Orchidaceae  | Asparagales  |
| PhapFT1C1 | PATC027165            | ORCHIDSTR A | <i>Phalaenopsis aphrodite</i> | Orchidaceae  | Asparagales  |
| PhapFT1C2 | PATC046164            | ORCHIDSTR A | <i>Phalaenopsis aphrodite</i> | Orchidaceae  | Asparagales  |
| PhapFT2A  | PATC022841            | ORCHIDSTR A | <i>Phalaenopsis aphrodite</i> | Orchidaceae  | Asparagales  |
| PhapMFT   | PATC134478            | ORCHIDSTR A | <i>Phalaenopsis aphrodite</i> | Orchidaceae  | Asparagales  |
| PhbeFT1A1 | PBTC029555            | ORCHIDSTR A | <i>Phalaenopsis bellina</i>   | Orchidaceae  | Asparagales  |

# Supplementary Material

|           |                |                |                                   |             |             |
|-----------|----------------|----------------|-----------------------------------|-------------|-------------|
| PhbeFT1A2 | PBTC032059     | ORCHIDSTR<br>A | <i>Phalaenopsis<br/>bellina</i>   | Orchidaceae | Asparagales |
| PhbeFT1B  | PBTC025055     | ORCHIDSTR<br>A | <i>Phalaenopsis<br/>bellina</i>   | Orchidaceae | Asparagales |
| PhbeFT1C  | PBTC045435     | ORCHIDSTR<br>A | <i>Phalaenopsis<br/>bellina</i>   | Orchidaceae | Asparagales |
| PhbeFT2A1 | PBTC040134     | ORCHIDSTR<br>A | <i>Phalaenopsis<br/>bellina</i>   | Orchidaceae | Asparagales |
| PhbeFT2A2 | PBTC005504     | ORCHIDSTR<br>A | <i>Phalaenopsis<br/>bellina</i>   | Orchidaceae | Asparagales |
| PhbeMFT1  | PBTC005650     | ORCHIDSTR<br>A | <i>Phalaenopsis<br/>bellina</i>   | Orchidaceae | Asparagales |
| PhbeMFT2  | PBTC022225     | ORCHIDSTR<br>A | <i>Phalaenopsis<br/>bellina</i>   | Orchidaceae | Asparagales |
| PheqFT1A1 | PETC031734     | ORCHIDSTR<br>A | <i>Phalaenopsis<br/>equestris</i> | Orchidaceae | Asparagales |
| PheqFT1A2 | XM_020743463.1 | NCBI           | <i>Phalaenopsis<br/>equestris</i> | Orchidaceae | Asparagales |
| PheqFT1B1 | XM_020728915.1 | NCBI           | <i>Phalaenopsis<br/>equestris</i> | Orchidaceae | Asparagales |
| PheqFT1B2 | PETC012131     | ORCHIDSTR<br>A | <i>Phalaenopsis<br/>equestris</i> | Orchidaceae | Asparagales |
| PheqFT1B3 | XM_020736438.1 | NCBI           | <i>Phalaenopsis<br/>equestris</i> | Orchidaceae | Asparagales |
| PheqFT1C1 | XM_020721263.1 | NCBI           | <i>Phalaenopsis<br/>equestris</i> | Orchidaceae | Asparagales |
| PheqFT1C2 | XM_020721262.1 | NCBI           | <i>Phalaenopsis<br/>equestris</i> | Orchidaceae | Asparagales |
| PheqFT1C3 | XM_020721260.1 | NCBI           | <i>Phalaenopsis<br/>equestris</i> | Orchidaceae | Asparagales |
| PheqFT1C4 | XM_020721261.1 | NCBI           | <i>Phalaenopsis<br/>equestris</i> | Orchidaceae | Asparagales |

|               |                |                |                                              |             |             |
|---------------|----------------|----------------|----------------------------------------------|-------------|-------------|
| PheqFT2A1     | PETC020741     | ORCHIDSTR<br>A | <i>Phalaenopsis<br/>equestris</i>            | Orchidaceae | Asparagales |
| PheqFT2A2     | XM_020740221.1 | NCBI           | <i>Phalaenopsis<br/>equestris</i>            | Orchidaceae | Asparagales |
| PheqMFT       | XM_020716332.1 | NCBI           | <i>Phalaenopsis<br/>equestris</i>            | Orchidaceae | Asparagales |
| PhFT          | JX162558.1     | NCBI           | <i>Phalaenopsis<br/>Fortune<br/>Saltzman</i> | Orchidaceae | Asparagales |
| PhhcFT2B      | KC138805.1     | NCBI           | <i>Phalaenopsis<br/>hybrid cultivar</i>      | Orchidaceae | Asparagales |
| PhluFT1A1     | PLTC041567     | ORCHIDSTR<br>A | <i>Phalaenopsis<br/>lueddemannia<br/>na</i>  | Orchidaceae | Asparagales |
| PhluFT1A2     | PLTC012154     | ORCHIDSTR<br>A | <i>Phalaenopsis<br/>lueddemannia<br/>na</i>  | Orchidaceae | Asparagales |
| PhluFT1A3     | PLTC040993     | ORCHIDSTR<br>A | <i>Phalaenopsis<br/>lueddemannia<br/>na</i>  | Orchidaceae | Asparagales |
| PhluFT1B1     | PLTC029443     | ORCHIDSTR<br>A | <i>Phalaenopsis<br/>lueddemannia<br/>na</i>  | Orchidaceae | Asparagales |
| PhluFT1B2     | PLTC035491     | ORCHIDSTR<br>A | <i>Phalaenopsis<br/>lueddemannia<br/>na</i>  | Orchidaceae | Asparagales |
| PhluFT1C      | PLTC025259     | ORCHIDSTR<br>A | <i>Phalaenopsis<br/>lueddemannia<br/>na</i>  | Orchidaceae | Asparagales |
| PhluFT2A      | PLTC045838     | ORCHIDSTR<br>A | <i>Phalaenopsis<br/>lueddemannia<br/>na</i>  | Orchidaceae | Asparagales |
| PhluMFT       | PLTC005308     | ORCHIDSTR<br>A | <i>Phalaenopsis<br/>lueddemannia<br/>na</i>  | Orchidaceae | Asparagales |
| PhmoFT1A<br>1 | PMTC000546     | ORCHIDSTR<br>A | <i>Phalaenopsis<br/>modesta</i>              | Orchidaceae | Asparagales |

# Supplementary Material

|               |                                                   |                |                                      |             |              |
|---------------|---------------------------------------------------|----------------|--------------------------------------|-------------|--------------|
| PhmoFT1A<br>2 | PMTC002321                                        | ORCHIDSTR<br>A | <i>Phalaenopsis<br/>modesta</i>      | Orchidaceae | Asparagales  |
| PhmoFT1C      | PMTC004339                                        | ORCHIDSTR<br>A | <i>Phalaenopsis<br/>modesta</i>      | Orchidaceae | Asparagales  |
| PhmoFT2A      | PMTC014557                                        | ORCHIDSTR<br>A | <i>Phalaenopsis<br/>modesta</i>      | Orchidaceae | Asparagales  |
| PhscMFT       | PSTC047386                                        | ORCHIDSTR<br>A | <i>Phalaenopsis<br/>schilleriana</i> | Orchidaceae | Asparagales  |
| PimeMFT1      | MAGPIE:pme_PMERO1JP_Mira--<br>PMEROJP1_rep_c21879 | Phytometasyn   | <i>Piper<br/>methysticum</i>         | Piperaceae  | Piperales    |
| PimeMFT2      | MAGPIE:pme_PMERO1JP_Mira--<br>PMEROJP1_rep_c13102 | Phytometasyn   | <i>Piper<br/>methysticum</i>         | Piperaceae  | Piperales    |
| PimeMFT3      | MAGPIE:pme_PMERO1JP_Mira--<br>PMEROJP1_rep_c15674 | Phytometasyn   | <i>Piper<br/>methysticum</i>         | Piperaceae  | Piperales    |
| PlocMFT       | MAGPIE:poc_POCLF1PC_Mira--<br>POCLF1PC_c12569     | Phytometasyn   | <i>Platanus<br/>occidentalis</i>     | Platanaceae | Proteales    |
| PotrBFT       | Potri.015G141300.1                                | Phytozome      | <i>Populus<br/>trichocarpa</i>       | Salicaceae  | Malpighiales |
| PotrCEN1      | Potri.004G203900.1                                | Phytozome      | <i>Populus<br/>trichocarpa</i>       | Salicaceae  | Malpighiales |
| PotrCEN2      | Potri.009G165100.1                                | Phytozome      | <i>Populus<br/>trichocarpa</i>       | Salicaceae  | Malpighiales |
| PotrMFT       | Potri.015G041000.1                                | Phytozome      | <i>Populus<br/>trichocarpa</i>       | Salicaceae  | Malpighiales |
| PtFT1         | Potri.008G077700.1                                | Phytozome      | <i>Populus<br/>trichocarpa</i>       | Salicaceae  | Malpighiales |
| PtFT2         | Potri.010G179700.1                                | Phytozome      | <i>Populus<br/>trichocarpa</i>       | Salicaceae  | Malpighiales |
| PtFT3         | Potri.010G179900.1                                | Phytozome      | <i>Populus<br/>trichocarpa</i>       | Salicaceae  | Malpighiales |
| PtFT4         | Potri.002G210200.1                                | Phytozome      | <i>Populus<br/>trichocarpa</i>       | Salicaceae  | Malpighiales |

|            |                    |           |                              |             |             |
|------------|--------------------|-----------|------------------------------|-------------|-------------|
| SaofFT1A   | DN195601           | NCBI      | <i>Saccharum officinarum</i> | Poaceae     | Poales      |
| SaofTFL1   | CF571229           | NCBI      | <i>Saccharum officinarum</i> | Poaceae     | Poales      |
| SejaFT2B   | KF669644.1         | NCBI      | <i>Sedirea japonica</i>      | Orchidaceae | Asparagales |
| SobiFT1A1  | XM_002451782       | NCBI      | <i>Sorghum bicolor</i>       | Poaceae     | Poales      |
| SobiFT1A2  | XM_002446227       | NCBI      | <i>Sorghum bicolor</i>       | Poaceae     | Poales      |
| SobiFT1A3  | XM_002438506       | NCBI      | <i>Sorghum bicolor</i>       | Poaceae     | Poales      |
| SobiFT1B1  | XM_002454089       | NCBI      | <i>Sorghum bicolor</i>       | Poaceae     | Poales      |
| SobiFT1B2  | XM_002443040       | NCBI      | <i>Sorghum bicolor</i>       | Poaceae     | Poales      |
| SobiFT2B   | XM_002436464       | NCBI      | <i>Sorghum bicolor</i>       | Poaceae     | Poales      |
| SobiFT6    | XM_002456309       | NCBI      | <i>Sorghum bicolor</i>       | Poaceae     | Poales      |
| SobiMFT    | XM_002457449       | NCBI      | <i>Sorghum bicolor</i>       | Poaceae     | Poales      |
| SobiTFL1_1 | XM_002442763       | NCBI      | <i>Sorghum bicolor</i>       | Poaceae     | Poales      |
| SobiTFL1_2 | XM_002450238       | NCBI      | <i>Sorghum bicolor</i>       | Poaceae     | Poales      |
| SobiTFL1_3 | XM_002453886       | NCBI      | <i>Sorghum bicolor</i>       | Poaceae     | Poales      |
| SolyBFT1   | Solyc01g009560.1.1 | Phytozome | <i>Solanum lycopersicum</i>  | Solanaceae  | Solanales   |
| SolyBFT2   | Solyc01g009580.1.1 | Phytozome | <i>Solanum lycopersicum</i>  | Solanaceae  | Solanales   |
| SolyBFT3   | Solyc03g026050.2.1 | Phytozome | <i>Solanum lycopersicum</i>  | Solanaceae  | Solanales   |

## Supplementary Material

|           |                      |           |                                |            |           |
|-----------|----------------------|-----------|--------------------------------|------------|-----------|
| SolyCEN1  | Solyc06g074350.2.1   | Phytozome | <i>Solanum lycopersicum</i>    | Solanaceae | Solanales |
| SolyCEN2  | U84140               | NCBI      | <i>Lycopersicon esculentum</i> | Solanaceae | Solanales |
| SolyCEN3  | Solyc09g009560.1.1   | Phytozome | <i>Solanum lycopersicum</i>    | Solanaceae | Solanales |
| SolyFT1_1 | Solyc05g055660.1.1   | Phytozome | <i>Solanum lycopersicum</i>    | Solanaceae | Solanales |
| SolyFT1_2 | Solyc05g053850.2.1   | Phytozome | <i>Solanum lycopersicum</i>    | Solanaceae | Solanales |
| SolyFT1_3 | Solyc11g008660.1.1   | Phytozome | <i>Solanum lycopersicum</i>    | Solanaceae | Solanales |
| SolyFT1_4 | Solyc11g008640.1.1   | Phytozome | <i>Solanum lycopersicum</i>    | Solanaceae | Solanales |
| SolyFT1_5 | Solyc11g008650.1.1   | Phytozome | <i>Solanum lycopersicum</i>    | Solanaceae | Solanales |
| SolyFT1_6 | Solyc03g063100.1.1   | Phytozome | <i>Solanum lycopersicum</i>    | Solanaceae | Solanales |
| SolyMFT1  | Solyc03g119100.1.1   | Phytozome | <i>Solanum lycopersicum</i>    | Solanaceae | Solanales |
| SolyMFT2  | Solyc02g079290.2     | Phytozome | <i>Solanum lycopersicum</i>    | Solanaceae | Solanales |
| SotuBFT1  | PGSC0003DMT400030575 | Phytozome | <i>Solanum tuberosum</i>       | Solanaceae | Solanales |
| SotuBFT2  | PGSC0003DMT400030582 | Phytozome | <i>Solanum tuberosum</i>       | Solanaceae | Solanales |
| SotuBFT3  | PGSC0003DMT400037143 | Phytozome | <i>Solanum tuberosum</i>       | Solanaceae | Solanales |
| SotuCEN   | DQ307621             | NCBI      | <i>Solanum tuberosum</i>       | Solanaceae | Solanales |
| SotuFT1_1 | PGSC0003DMT400041725 | Phytozome | <i>Solanum tuberosum</i>       | Solanaceae | Solanales |

|           |                          |           |                               |             |             |
|-----------|--------------------------|-----------|-------------------------------|-------------|-------------|
| SotuFT1_2 | PGSC0003DMT400041726     | Phytozome | <i>Solanum tuberosum</i>      | Solanaceae  | Solanales   |
| StpuFT2C  | TRINITY_DN58232_c0_g1_i1 | UdeA      | <i>Stelis pusilla</i>         | Orchidaceae | Asparagales |
| StpuFT1B  | TRINITY_DN29778_c0_g1_i1 | UdeA      | <i>Stelis pusilla</i>         | Orchidaceae | Asparagales |
| StpuFT1C1 | TRINITY_DN47332_c0_g1_i1 | UdeA      | <i>Stelis pusilla</i>         | Orchidaceae | Asparagales |
| StpuFT1C2 | TRINITY_DN64228_c0_g1_i1 | UdeA      | <i>Stelis pusilla</i>         | Orchidaceae | Asparagales |
| StpuFT2A1 | TRINITY_DN30350_c0_g1_i1 | UdeA      | <i>Stelis pusilla</i>         | Orchidaceae | Asparagales |
| StpuFT2A2 | TRINITY_DN30350_c0_g1_i2 | UdeA      | <i>Stelis pusilla</i>         | Orchidaceae | Asparagales |
| StpuFT2A3 | TRINITY_DN30350_c0_g1_i3 | UdeA      | <i>Stelis pusilla</i>         | Orchidaceae | Asparagales |
| StreFT1_1 | TRINITY_DN39864_c0_g1_i1 | UdeA      | <i>Streptosolen jamesonii</i> | Solanaceae  | Solanales   |
| StreFT1_2 | TRINITY_DN25611_c0_g1_i1 | UdeA      | <i>Streptosolen jamesonii</i> | Solanaceae  | Solanales   |
| StreFT1_3 | TRINITY_DN19473_c0_g1_i1 | UdeA      | <i>Streptosolen jamesonii</i> | Solanaceae  | Solanales   |
| StreMFT   | TRINITY_DN72085_c0_g1_i1 | UdeA      | <i>Streptosolen jamesonii</i> | Solanaceae  | Solanales   |
| StSP      | PGSC0003DMT400018307     | Phytozome | <i>Solanum tuberosum</i>      | Solanaceae  | Solanales   |
| StSP6A    | PGSC0003DMT400060057     | Phytozome | <i>Solanum tuberosum</i>      | Solanaceae  | Solanales   |
| StSP9D    | PGSC0003DMT400090526     | Phytozome | <i>Solanum tuberosum</i>      | Solanaceae  | Solanales   |
| TgFT1     | MG121853.1               | NCBI      | <i>Tulipa gesneriana</i>      | Liliaceae   | Liliales    |
| TgFT2     | MG121854.1               | NCBI      | <i>Tulipa gesneriana</i>      | Liliaceae   | Liliales    |
| TgFT3     | MG121855.1               | NCBI      | <i>Tulipa gesneriana</i>      | Liliaceae   | Liliales    |

# Supplementary Material

|           |                          |                |                                               |             |             |
|-----------|--------------------------|----------------|-----------------------------------------------|-------------|-------------|
| ToluFT1A  | TRINITY_DN35395_c0_g1_i1 | UdeA           | <i>Tolumnia</i><br>Cherry red x<br>Ralph yagh | Orchidaceae | Asparagales |
| ToluFT1C  | TRINITY_DN13131_c0_g1_i1 | UdeA           | <i>Tolumnia</i><br>Cherry red x<br>Ralph yagh | Orchidaceae | Asparagales |
| ToluFT2A1 | TRINITY_DN13162_c0_g1_i1 | UdeA           | <i>Tolumnia</i><br>Cherry red x<br>Ralph yagh | Orchidaceae | Asparagales |
| ToluFT2A2 | TRINITY_DN13162_c0_g1_i2 | UdeA           | <i>Tolumnia</i><br>Cherry red x<br>Ralph yagh | Orchidaceae | Asparagales |
| TracFT2B  | BT009051                 | NCBI           | <i>Triticum</i><br><i>aestivum</i>            | Poaceae     | Poales      |
| TracMFT   | BT008995                 | NCBI           | <i>Triticum</i><br><i>aestivum</i>            | Poaceae     | Poales      |
| TracTFL1  | AJ577366                 | NCBI           | <i>Triticum</i><br><i>aestivum</i>            | Poaceae     | Poales      |
| VaplFT1A1 | VPTC024845               | ORCHIDSTR<br>A | <i>Vanilla</i><br><i>planifolia</i>           | Orchidaceae | Asparagales |
| VaplFT1A2 | VPTC003814               | ORCHIDSTR<br>A | <i>Vanilla</i><br><i>planifolia</i>           | Orchidaceae | Asparagales |
| VaplFT1A3 | VPTC003875               | ORCHIDSTR<br>A | <i>Vanilla</i><br><i>planifolia</i>           | Orchidaceae | Asparagales |
| VaplFT1A4 | VPTC023242               | ORCHIDSTR<br>A | <i>Vanilla</i><br><i>planifolia</i>           | Orchidaceae | Asparagales |
| VaplFT1A5 | VPTC023243               | ORCHIDSTR<br>A | <i>Vanilla</i><br><i>planifolia</i>           | Orchidaceae | Asparagales |
| VaplFT1A6 | VPTC021349               | ORCHIDSTR<br>A | <i>Vanilla</i><br><i>planifolia</i>           | Orchidaceae | Asparagales |
| VaplFT1B1 | VPTC028579               | ORCHIDSTR<br>A | <i>Vanilla</i><br><i>planifolia</i>           | Orchidaceae | Asparagales |
| VaplFT1B2 | VPTC002523               | ORCHIDSTR<br>A | <i>Vanilla</i><br><i>planifolia</i>           | Orchidaceae | Asparagales |



|            |                     |                |                            |             |             |
|------------|---------------------|----------------|----------------------------|-------------|-------------|
| VaplFT1B3  | VPTC020362          | ORCHIDSTR<br>A | <i>Vanilla planifolia</i>  | Orchidaceae | Asparagales |
| VaplFT1C1  | VPTC001827          | ORCHIDSTR<br>A | <i>Vanilla planifolia</i>  | Orchidaceae | Asparagales |
| VaplFT1C2  | VPTC014381          | ORCHIDSTR<br>A | <i>Vanilla planifolia</i>  | Orchidaceae | Asparagales |
| VaplFT1C3  | VPTC023887          | ORCHIDSTR<br>A | <i>Vanilla planifolia</i>  | Orchidaceae | Asparagales |
| VaplFT2A1  | VPTC013244          | ORCHIDSTR<br>A | <i>Vanilla planifolia</i>  | Orchidaceae | Asparagales |
| VaplFT2A2  | VPTC021241          | ORCHIDSTR<br>A | <i>Vanilla planifolia</i>  | Orchidaceae | Asparagales |
| VaplFT2A3  | VPTC013243          | ORCHIDSTR<br>A | <i>Vanilla planifolia</i>  | Orchidaceae | Asparagales |
| VaplMFT1   | VPTC028836          | ORCHIDSTR<br>A | <i>Vanilla planifolia</i>  | Orchidaceae | Asparagales |
| VaplMFT2   | VPTC028837          | ORCHIDSTR<br>A | <i>Vanilla planifolia</i>  | Orchidaceae | Asparagales |
| VaplTFL1_1 | VPTC023176          | ORCHIDSTR<br>A | <i>Vanilla planifolia</i>  | Orchidaceae | Asparagales |
| VaplTFL1_2 | VPTC023149          | ORCHIDSTR<br>A | <i>Vanilla planifolia</i>  | Orchidaceae | Asparagales |
| VashFT1B   | Unigene8580_Va_fb   | Orchidbase     | <i>Vanilla shenzhenica</i> | Orchidaceae | Asparagales |
| VashTFL1   | Unigene126478_Va_fb | Orchidbase     | <i>Vanilla shenzhenica</i> | Orchidaceae | Asparagales |
| ViviBFT    | DQ871593            | NCBI           | <i>Vitis vinifera</i>      | Vitaceae    | Vitales     |
| ViviCEN    | NM_001281000.1      | NCBI           | <i>Vitis vinifera</i>      | Vitaceae    | Vitales     |
| ViviFT1    | DQ504308.1          | NCBI           | <i>Vitis vinifera</i>      | Vitaceae    | Vitales     |
| ViviMFT1   | GSVIVT01008404001   | Phytozome      | <i>Vitis vinifera</i>      | Vitaceae    | Vitales     |
| ViviMFT2   | DQ871594            | NCBI           | <i>Vitis vinifera</i>      | Vitaceae    | Vitales     |

## Supplementary Material

|               |                       |           |                         |              |             |
|---------------|-----------------------|-----------|-------------------------|--------------|-------------|
| ViviMFT3      | GSVIVT01003663001     | Phytozome | <i>Vitis vinifera</i>   | Vitaceae     | Vitales     |
| ViviTFL1_1    | GSVIVT01033829001     | Phytozome | <i>Vitis vinifera</i>   | Vitaceae     | Vitales     |
| ViviTFL1_2    | DQ871592              | NCBI      | <i>Vitis vinifera</i>   | Vitaceae     | Vitales     |
| YubrFT1B      | YBML_scaffold_2022499 | 1KP       | <i>Yucca brevifolia</i> | Asparagaceae | Asparagales |
| YubrFT2A      | YBML_scaffold_2030879 | 1KP       | <i>Yucca brevifolia</i> | Asparagaceae | Asparagales |
| YubrFT2C      | YBML_scaffold_2121017 | 1KP       | <i>Yucca brevifolia</i> | Asparagaceae | Asparagales |
| ZemaFT1A<br>1 | Zm00008a021623        | Phytozome | <i>Zea mays</i>         | Poaceae      | Poales      |
| ZemaFT1A<br>2 | Zm00008a013824        | Phytozome | <i>Zea mays</i>         | Poaceae      | Poales      |
| ZemaFT1B1     | GRMZM2G062052         | Phytozome | <i>Zea mays</i>         | Poaceae      | Poales      |
| ZemaFT1B2     | GRMZM2G075215         | Phytozome | <i>Zea mays</i>         | Poaceae      | Poales      |
| ZemaFT1C      | GRMZM2G158809         | Phytozome | <i>Zea mays</i>         | Poaceae      | Poales      |
| ZemaFT2B1     | Zm00008a024302        | Phytozome | <i>Zea mays</i>         | Poaceae      | Poales      |
| ZemaFT2B2     | Zm00008a030326        | Phytozome | <i>Zea mays</i>         | Poaceae      | Poales      |
| ZemaMFT1      | BT016592              | NCBI      | <i>Zea mays</i>         | Poaceae      | Poales      |
| ZemaTFL1      | Zm00008a014804        | Phytozome | <i>Zea mays</i>         | Poaceae      | Poales      |
| ZemaZCN1      | EU241917              | NCBI      | <i>Zea mays</i>         | Poaceae      | Poales      |
| ZemaZCN1<br>0 | EU241926              | NCBI      | <i>Zea mays</i>         | Poaceae      | Poales      |
| ZemaZCN1<br>1 | GRMZM2G117057         | Phytozome | <i>Zea mays</i>         | Poaceae      | Poales      |
| ZemaZCN1<br>2 | EU241928              | NCBI      | <i>Zea mays</i>         | Poaceae      | Poales      |

|               |                  |           |                       |             |             |
|---------------|------------------|-----------|-----------------------|-------------|-------------|
| ZemaZCN1<br>4 | EU241929         | NCBI      | <i>Zea mays</i>       | Poaceae     | Poales      |
| ZemaZCN1<br>5 | EU241930         | NCBI      | <i>Zea mays</i>       | Poaceae     | Poales      |
| ZemaZCN1<br>6 | EU241931         | NCBI      | <i>Zea mays</i>       | Poaceae     | Poales      |
| ZemaZCN1<br>7 | EU241932         | NCBI      | <i>Zea mays</i>       | Poaceae     | Poales      |
| ZemaZCN1<br>8 | EU241933         | NCBI      | <i>Zea mays</i>       | Poaceae     | Poales      |
| ZemaZCN1<br>9 | EU241934         | NCBI      | <i>Zea mays</i>       | Poaceae     | Poales      |
| ZemaZCN2      | GRMZM2G156079    | Phytozome | <i>Zea mays</i>       | Poaceae     | Poales      |
| ZemaZCN2<br>0 | EU241935         | NCBI      | <i>Zea mays</i>       | Poaceae     | Poales      |
| ZemaZCN3      | EU241919         | NCBI      | <i>Zea mays</i>       | Poaceae     | Poales      |
| ZemaZCN5      | EU241921         | NCBI      | <i>Zea mays</i>       | Poaceae     | Poales      |
| ZemaZCN6      | EU241922         | NCBI      | <i>Zea mays</i>       | Poaceae     | Poales      |
| ZemaZCN8      | EU241924         | NCBI      | <i>Zea mays</i>       | Poaceae     | Poales      |
| ZemaZCN9      | EU241925         | NCBI      | <i>Zea mays</i>       | Poaceae     | Poales      |
| ZomaFT1_1     | Zosma118g00560.1 | Phytozome | <i>Zostera marina</i> | Zosteraceae | Alismatales |
| ZomaFT1_2     | Zosma189g00010.1 | Phytozome | <i>Zostera marina</i> | Zosteraceae | Alismatales |
| ZomaFT1_3     | Zosma354g00060.1 | Phytozome | <i>Zostera marina</i> | Zosteraceae | Alismatales |
| ZomaFT1_4     | Zosma21g00670.1  | Phytozome | <i>Zostera marina</i> | Zosteraceae | Alismatales |
| ZomaMFT       | Zosma246g00290.1 | Phytozome | <i>Zostera marina</i> | Zosteraceae | Alismatales |

# Supplementary Material

|            |                  |           |                       |             |             |
|------------|------------------|-----------|-----------------------|-------------|-------------|
| ZomaTFL1_1 | Zosma165g00160.1 | Phytozome | <i>Zostera marina</i> | Zosteraceae | Alismatales |
| ZomaTFL1_2 | Zosma2g00820.1   | Phytozome | <i>Zostera marina</i> | Zosteraceae | Alismatales |
